1 **Defining composition and function of the rhizosphere microbiota of barley**  
2 **genotypes exposed to growth-limiting nitrogen supplies**

3 Rodrigo Alegria Terrazas<sup>a,b,¶</sup>, Senga Robertson-Albertyn<sup>a,¶</sup>, Aileen Mary Corral<sup>a</sup>,  
4 Carmen Escudero-Martinez<sup>a</sup>, Rumana Kapadia<sup>a</sup>, Katharin Balbirnie-Cumming<sup>a</sup>,  
5 Jenny Morris<sup>c</sup>, Pete E Hedley<sup>c</sup>, Matthieu Barret<sup>d</sup>, Gloria Torres<sup>d,e</sup>, Eric Paterson<sup>e</sup>,  
6 Elizabeth M Baggs<sup>f</sup>, James Abbott<sup>g#</sup> and Davide Bulgarelli<sup>a#</sup>

7 <sup>a</sup>University of Dundee, Plant Sciences, School of Life Sciences, Dundee, United  
8 Kingdom;

9 <sup>b</sup> Mohammed VI Polytechnic University, Agrobiosciences Program, Plant & Soil  
10 Microbiome Subprogram, Benguerir, Morocco

11 <sup>c</sup>Cell and Molecular Sciences, The James Hutton Institute, Dundee, United  
12 Kingdom;

13 <sup>d</sup>University of Angers, Institut Agro, INRAE, IRHS, SFR QUASAV, F-49000 Angers,  
14 France;

15 <sup>e</sup>Kimitec Biogroup. Paraje Cerro de Los Lobos S/N - 04738 VÍcar, ALMERIA, Spain

16 <sup>f</sup>Ecological Sciences, The James Hutton Institute, Aberdeen, United Kingdom;

17 <sup>g</sup>Global Academy of Agriculture and Food Systems, University of Edinburgh,  
18 Midlothian, United Kingdom;

19 <sup>h</sup>University of Dundee, Data Analysis Group, School of Life Sciences, Dundee,  
20 United Kingdom;

21

22 Running Head: barley microbiota and soil nitrogen

23

24 Rodrigo Alegria Terrazas and Senga Robertson-Albertyn contributed equally to this  
25 work. Author order was determined alphabetically.

26

27 #Address correspondence to James Abbott, [j.abbott@dundee.ac.uk](mailto:j.abbott@dundee.ac.uk) and Davide

28 Bulgarelli [d.bulgarelli@dundee.ac.uk](mailto:d.bulgarelli@dundee.ac.uk)

29

## 30 **Abstract**

31 The microbiota populating the rhizosphere, the interface between roots and soil, can  
32 modulate plant growth, development and health. These microbial communities are  
33 not stochastically assembled from the surrounding soil but their composition and  
34 putative function are controlled, at least partially, by the host plant. Here we use the  
35 staple cereal barley as a model to gain novel insights into the impact of differential  
36 applications of nitrogen, a rate-limiting step for global crop production, on the host  
37 genetic control of the rhizosphere microbiota. Using a high-throughput amplicon  
38 sequencing survey, we determined that nitrogen availability for plant uptake is a  
39 factor promoting the selective enrichment of individual taxa in the rhizosphere of wild  
40 and domesticated barley genotypes. Shotgun sequencing and metagenome-  
41 assembled genomes revealed that this taxonomic diversification is mirrored by a  
42 functional specialisation, manifested by the differential enrichment of multiple GO-  
43 terms, of the microbiota of plants exposed to nitrogen conditions limiting barley  
44 growth. Finally, a plant soil feedback experiment revealed that the host control on the  
45 barley microbiota underpins the assembly of a phylogenetically diverse group of  
46 bacteria putatively required to sustain plant performance under nitrogen-limiting  
47 supplies. Taken together, our observations indicate that under nitrogen conditions  
48 limiting plant growth, plant-microbe and microbe-microbe interactions fine-tune the  
49 host genetic selection of the barley microbiota at both taxonomic and functional  
50 levels. The disruption of these recruitment cues negatively impacts plant growth.

## 51 **Importance**

52 The microbiota inhabiting the rhizosphere, the thin layer of soil surrounding plant  
53 roots, can promote the growth, development, and health of their host plants.  
54 Previous research indicated that differences in the genetic composition of the host

55 plant coincide with differences in the composition of the rhizosphere microbiota. This  
56 is particularly evident when looking at the microbiota associated to input-demanding  
57 modern cultivated varieties and their wild relatives, which have evolved under  
58 marginal conditions. However, the functional significance of these differences  
59 remains to be fully elucidated. We investigated the rhizosphere microbiota of wild  
60 and cultivated genotypes of the global crop barley and determined that nutrient  
61 conditions limiting plant growth amplify the host control on microbes at the root-soil  
62 interface. This is reflected in a plant- and genotype-dependent functional  
63 specialisation of the rhizosphere microbiota which appears required for optimal plant  
64 growth. These findings provide novel insights into the significance of the rhizosphere  
65 microbiota for plant growth and sustainable agriculture

## 66 **Introduction**

67 To sustainably enhance global food security, innovative strategies to increase  
68 crop production while preserving natural resources are required (1-3). Capitalising on  
69 the microbial communities thriving in association with plants, collectively referred to  
70 as the plant microbiota (4, 5), has been identified as one of these innovative  
71 strategies (6). For instance, members of the microbiota populating the rhizosphere,  
72 the interface between roots and soil, can provide their plant host with access to  
73 mineral nutrients and protection against abiotic and biotic stresses (7). Thus,  
74 applications of the plant microbiota have the potential to integrate and progressively  
75 replace non-renewable inputs in crop production (8).

76 This potential is of particular interest for alternative to nitrogen (N) applications  
77 to staple crops, such as cereals, as approximately 50% of applied fertilisers are lost  
78 either in the atmosphere or in groundwater (9, 10). largely as a consequence of  
79 microbial denitrification and nitrification processes. Soil microbes can contribute to

80 the release of nitrogen from soil organic matter (SOM) for plant uptake (11). These  
81 mineralisation processes are estimated to contribute more than 50% of crop nitrogen  
82 (12), even in intensively fertilised systems, and are the fundamental basis of  
83 sustained plant productivity in uncultivated soils, as typically more than 90% of soil N  
84 is present in organic forms (13). The importance of the plant in influencing these  
85 microbial mineralisation processes has been highlighted by the phenomenon of  
86 rhizosphere priming effects (14), where root release of organic compounds impacts  
87 rates of SOM decomposition and nitrogen mobilisation (15) Therefore, elucidating of  
88 the relationships between rhizosphere microbiota composition and nitrogen  
89 availability for plant uptake can be a key towards sustainable crop production (16).

90 The composition of the rhizosphere microbiota is driven, at least in part, by  
91 the genetics of its host plants (4, 17). In turn, the processes of domestication and  
92 breeding selection, which progressively differentiated wild ancestors from modern,  
93 'elite', cultivated varieties (18) modulated plant's capacity of shaping the microbiota  
94 thriving at the root-soil interface (19, 20). As crop wild relatives have evolved in  
95 marginal soils, i.e., not exposed to synthetic fertilisers, their microbiota may be  
96 equipped with beneficial functions for sustainable agriculture (7, 21). Despite that the  
97 impact of plant domestication on the rhizosphere microbiota has been studied in  
98 multiple plant species (22-27), the significance of microbial diversification between  
99 wild and cultivated plant genotypes of the same species remains to be fully  
100 elucidated (21, 28).

101 Barley (*Hordeum vulgare*), the fourth most cultivated cereal worldwide (29),  
102 represents an attractive model to investigate the host genetic control of the  
103 rhizosphere microbiota within a framework of plant domestication. For instance, we  
104 previously demonstrated that domesticated (*H. vulgare* ssp. *vulgare*) and wild (*H.*

105 *vulgare* ssp. *spontaneum*) barley genotypes host microbiotas of contrasting  
106 composition (30, 31). More recently, we gathered novel insights into the genetic  
107 basis of this host-mediated microbiota diversification (32-34). In parallel,  
108 investigations targeting specific microbial genes indicated that barley plants may  
109 exert a control on microbes underpinning the nitrogen biogeochemical cycle (35)  
110 and that this effect is dependent on community composition (36). However, it is  
111 unclear how genetic differences between wild and domesticated genotypes may  
112 impact on the composition and function of the rhizosphere microbiota of plants  
113 exposed to contrasting nitrogen supplies, in particular the ones limiting plant growth.

114 To address this knowledge gap, in this investigation we used barley as an  
115 experimental model and state-of-the art sequencing approaches to test three  
116 interconnected hypotheses. First, we hypothesised that the host control on  
117 rhizosphere bacteria is modulated by, and responds to, nitrogen availability for plant  
118 uptake. Specifically, we anticipated that differences in microbiota composition among  
119 barley genotypes is maximal under limiting nitrogen supplies, when plants rely on  
120 their microbiota for N-cycling processes to support optimal growth. We further  
121 hypothesised that, under conditions limiting barley growth, plant's reliance on the  
122 rhizosphere microbes will be manifested by a functional diversification mediated, at  
123 least partially, by the host genotype. Finally, we hypothesised that that these distinct  
124 structural and functional configurations of the microbiota contributed to differential  
125 plant growth responses.

126 **Results**

127 **Nitrogen conditions limiting plant growth amplify the host effect on the barley**

128 **rhizosphere microbiota**

129 To gain insights into the role played by nitrogen availability for plant uptake on  
130 the composition of the barley bacterial microbiota, we selected one reference barley  
131 cultivar, Morex (hereafter 'Elite'), and two wild genotypes from the B1K collection  
132 (37), B1K-12 and B1K-31 (hereafter 'Desert' and 'North' respectively). The rationale  
133 for this choice was two-pronged. First, we previously characterised these genotypes  
134 for their capacity for recruiting distinct microbiotas and genetic relatedness (30, 31).  
135 Second, the wild genotypes are representative of the two main barley ecotypes  
136 identified in the Southern Levant as drivers of plant's adaptation to the environment  
137 (38, 39). Consequently, and despite the limited number, these genotypes may  
138 capture the "extremes" of the evolutionary pressure on the host recruitment cues of  
139 the barley microbiota. Plants were grown under glasshouse conditions (Methods) in  
140 an agricultural soil previously used for microbiota investigations and designated  
141 'Quarryfield' (31, 33, 34, 40). Pots containing the individual genotypes, and  
142 unplanted soil controls (hereafter 'Bulk'), were supplemented with three modified  
143 Hoagland's solution preparations (41) containing all essential macro and  
144 micronutrients and three levels of mineral nitrogen (Table S1): the optimum required  
145 for barley growth (N100%), a quarter of dosage (N25%) or no nitrogen (N0%). At  
146 early stem elongation (Figure S1), which represents the onset of maximum nitrogen  
147 uptake for small grain cereals (42) plants were harvested, and total DNA  
148 preparations were obtained from rhizosphere and unplanted soil specimens. In  
149 parallel, we determined aboveground plant biomass, plant nitrogen content in leaves

150 as well as concentrations of ammonium ( $\text{NH}_4^+$ ) and nitrate ( $\text{NO}_3^-$ ) in rhizosphere and  
151 unplanted soil samples.

152 We observed that plant performance was affected by the N application:  
153 aboveground biomass and plant nitrogen content were significantly lower at N0%  
154 compared to N100%, with N25% yielding intermediate values (Kruskal-Wallis test  
155 followed by Dunn post-hoc test, individual  $P$  values  $<0.05$ , FDR corrected, Figure 1)  
156 compatible with a nitrogen-deficiency status for barley growth. Likewise, the residual  
157 nitrogen in the rhizosphere at the completion of the experiments, measured as a  
158 concentration of ammonium and nitrate respectively, displayed a significant  
159 decrease in the values recorded for N100% to N25% and from this latter to N0%.  
160 (Kruskal-Wallis test followed by Dunn post-hoc test, individual  $P$  values  $<0.05$ , FDR  
161 corrected, Figure 1).

162 In parallel, we generated a 16S rRNA gene amplicon sequencing library from  
163 the obtained rhizosphere and unplanted soil controls and we identified 26,411  
164 individual Amplicon Sequencing Variants (ASVs) accruing from 6,097,808  
165 sequencing reads. After pruning *in silico* ASVs representing either host (i.e., plastid-  
166 or mitochondrial-derived sequences) or environmental contaminations, as well as  
167 low count ASVs, 5,035,790 reads were retained, representing over the 82% of the  
168 initial dataset. Canonical Analysis of Principal Coordinates (CAP) differentiated bulk  
169 soil from rhizosphere profiles as evidenced by a segregation of either class of  
170 samples along the axis accounting for the largest source of variation (Figure 2A).  
171 Furthermore, we observed a “gradient” along the axis accounting for the second  
172 source of variation aligned with the treatment effect, in particular for rhizosphere  
173 samples (Figure 2A). The sample effect, i.e., either bulk soils or the rhizosphere of  
174 the individual genotypes, exerted the primary impact on the bacterial communities



175 thriving at the root-soil interface (Permanova,  $R^2= 0.418$ ,  $P$  value = 0.0002, 5,000  
176 permutations, Figure 2A) followed by the nitrogen treatment effect (Permanova,  $R^2=$   
177 0.105,  $P$  value =0.0004; 5,000 permutations, Figure 2B) and their interaction term  
178 (Permanova,  $R^2= 0.098$ ,  $P$  value =0.0380; 5,000 permutations, Figure 2B).

179 To further examine the impact of the treatment on the abundance of individual  
180 prokaryotic ASVs underpinning host-mediated diversification, we performed a set of  
181 pair-wise comparisons between barley genotypes at the different N levels. We  
182 observed that N0% was associated with the largest number of differentially recruited  
183 ASVs, while higher N levels progressively obliterated recruitment differences among  
184 genotypes (Wald test, Individual  $P$  values < 0.05, FDR corrected, Figure 2B). Of  
185 note, and congruent with previous experiments conducted in the same soil (31), the  
186 pair 'Elite'-'Desert' yielded the highest number of differentially recruited ASVs (Figure  
187 2B).

188 Taken together, these observations indicate that nitrogen availability for plant  
189 uptake is a factor in *a*) modulating the microhabitat- and genotype-dependent  
190 recruitment cues of the barley bacterial microbiota, by *b*) promoting the selective  
191 enrichment of individual taxa in the rhizosphere and, *c*) whose magnitude is  
192 maximised when no nitrogen is applied to the system.

### 193 [The metabolic potential of the rhizosphere microbiota exposed to nitrogen conditions](#) 194 [limiting barley growth](#)

195 We generated over 412 million paired-end metagenomic reads from 12  
196 additional samples to gain insights into the functional significance of microbiota  
197 diversification in plants exposed to nitrogen conditions limiting barley growth. These  
198 represented three biological replicates each of Bulk soil and the rhizosphere of

199 'Elite', 'North' and 'Desert' exposed to the N0% treatment. Upon in-silico removal of  
200 low-quality sequences and sequences matching the barley genome, likely  
201 representing a "host contamination" (Figure S2), taxonomic classification of the  
202 sequencing reads at kingdom level revealed that Bacteria outnumbered Fungi by two  
203 orders of magnitude, regardless of the sample investigated (Figure 3A). Closer  
204 inspection of the data classified within the kingdom fungi revealed no significant  
205 differences among samples for sequences assigned to the class Glomeromycetes,  
206 which we used as a proxy for the extra-radical mycelium of Arbuscular Mycorrhizal  
207 Fungi (AMF; Wald test, Individual  $P$  values  $> 0.05$ , FDR corrected, Figure 3B).  
208 Although the separation between replicates of the same genotype, in particular the  
209 'Elite'-'Desert' pair, was manifested exclusively when looking at bacteria, we  
210 identified a comparable effect of the sample type on composition of both bacterial  
211 and fungal communities. For instance, the  $R^2$  computed for normalised relative  
212 abundances returned values between 0.66 and 0.68 for the bacterial and fungal  
213 component, respectively (Permanova, 5,000 permutations, Individual  $P$  values  $<$   
214 0.01; Figures 3C and 3D).

215         Next, we mined the metagenomic dataset for sequencing reads associated  
216 with known genes underpinning the nitrogen biogeochemical cycle. We were able to  
217 identify genes implicated in processes as diverse as nitrification, denitrification,  
218 nitrate reduction as well as synthesis and degradation of nitrogen-containing organic  
219 compounds, although the abundances of genes associate to the individual process  
220 did not discriminate between barley genotypes (Wald test, Individual  $P$  values  $> 0.05$ ,  
221 FDR corrected, Figure S3). This suggests that, in the tested conditions, the host  
222 control of the nitrogen biogeochemical cycle does not represent the main driver of  
223 the functional diversification of the barley rhizosphere microbiota.

224           This motivated us to further discern the metabolic capacity of barley  
225 associated communities, by assembling metagenomic reads and predicting their  
226 encoded proteins. Predicted proteins were clustered, resulting in 10,554,104  
227 representative sequences. The representative protein sequences were subjected to  
228 functional enrichment analysis to identify GO categories differentially enriched in the  
229 barley rhizosphere. We observed a consistent ‘rhizosphere effect’ in the functional  
230 potential of the barley microbiota manifested by a spatial separation of plant-  
231 associated communities from Bulk soil in an ordination (Figure 4A) sustained by a  
232 differential enrichment of multiple GO categories (Figure 4B). Closer inspection of  
233 these categories revealed a significant enrichment of multiple GO terms in each of  
234 the tested genotypes and the Bulk soil alike (Wald test, Individual *P* values <0.05,  
235 FDR corrected, Table 2). In particular, the microbiota associated to ‘Desert’, ‘North’  
236 and the ‘Elite’ genotypes enriched for of GO-terms implicated in carbohydrate  
237 metabolic processing; cell adhesion, pathogenesis, response to abiotic stimulus,  
238 responses to chemical, protein-containing complex assembly as well as bacterial-  
239 type flagellum-dependent cell motility. These enrichments appear congruent with the  
240 adaptation of polymicrobial communities to a host capable of providing substrates for  
241 microbial growth. Conversely, bulk soil specimens were enriched predominantly for  
242 functions implicated photosynthesis and sporulation which are congruent with  
243 microbial adaptation to a lack of organic resources such as the case in unplanted  
244 soils.

245           To gain a finer view of the functional diversification of the bulk and  
246 rhizosphere microbiotas, we performed a cluster analysis of individual GO-terms on  
247 the top 10 clusters differentiating between samples (Figure S4). For each cluster we  
248 determined the significance of individual terms in pair-wise comparisons between

249 bulk soil and rhizosphere samples and, within the latter, between genotypes (Wald  
250 test, Individual  $P$  values  $<0.05$ , FDR corrected, Dataset S1). This allowed us to  
251 implicate nitrate transporters with functions putatively underpinning multitrophic  
252 interactions, such as response to reactive oxygen species and the type VI secretion  
253 system. These two functions were also significantly enriched in and differentiating  
254 between 'Elite' and 'Desert' communities (Wald test, Individual  $P$  values  $<0.05$ , FDR  
255 corrected, Dataset S1, cluster 6). Conversely, ammonium transporters were  
256 identified as a depleted function function in rhizosphere communities (Wald test,  
257 Individual  $P$  values  $<0.05$ , FDR corrected, Dataset S1, clusters 5 and 8) and so were  
258 functions implicated in phosphate metabolism, including 'cellular phosphate  
259 homeostasis', 'negative regulation of phosphate metabolic process' and 'phosphate  
260 ion transmembrane transport' (Wald test, Individual  $P$  values  $<0.05$ , FDR corrected,  
261 Dataset S1, clusters 5 and 8). The overarching picture emerging in this investigation  
262 was that, at the metagenomic resolution we obtained, the major effect on the  
263 functional potential of the microbiota is exerted by the microhabitat (i.e., bulk vs.  
264 rhizosphere). Conversely, the effect of the host genotype appears confined to a  
265 limited number of individual GO-terms and, congruently with the 16S rRNA gene  
266 survey, manifested predominantly in the comparison between 'Elite' and 'Desert'  
267 genotypes.

## 268 [Genome reconstruction of the bacteria populating the barley root-soil interface](#)

269 As a first step towards linking structural and functional diversification of the  
270 barley microbiota, we attempted to reconstruct genomes of individual bacteria  
271 proliferating at the root-soil interface. We assembled the generated metagenomic  
272 reads and combined contigs with similar nucleotide composition and differential  
273 abundance across samples. This resulted in the reconstruction of 60 Metagenome-

274 Assembled Genomes (MAGs) with a completion of > 50 % according to the presence  
275 of a minimal set of essential genes and a proportion of contamination < 10%  
276 (Methods). These MAGs were taxonomically affiliated to 12 different bacterial  
277 classes and their genome systematically mined for the top 10 GO-terms significantly  
278 enriched in the rhizosphere samples compared to Bulk soil controls (Wald test,  
279 individual  $P$  values < 0.05, FDR corrected; Figure 5). Next, we determined co-  
280 occurrence patterns between these terms and identified two clusters. One of those  
281 linking genomes coding for 'photosynthesis', 'carbohydrate metabolic process' and  
282 'iron-sulphur cluster assembly', while another one linking 'cellular component  
283 organization or biogenesis', 'response to chemical', 'bacterial-type flagellum-  
284 dependent cell motility' and 'protein-containing complex assembly' (Pearson's  
285 correlation, individual  $P$  value < 0.05; Figure 6). When we interpolated the results of  
286 these two analyses, we observed that this second cluster is predominantly  
287 represented by MAGs classified as Proteobacteria while the 'carbohydrate metabolic  
288 process' defining the first cluster was preferentially associated to MAGs classified as  
289 Bacteroidetes. For 11 of the 15 MAGs assigned to this phylum the presence of  
290 'carbohydrate metabolic process' predicted a significant enrichment of given MAGs  
291 in the microbiota of the Elite variety (Figure S5, Wald test, individual  $P$  value <0.05,  
292 FDR corrected). Conversely, among Proteobacterial MAGs, the selected GO terms  
293 failed to predict enrichment patterns in a given plant genotype (Figure S5, Wald test,  
294 individual  $P$  value <0.05, FDR corrected).

295 [A distinct bacterial consortium is associated to optimum barley growth under nitrogen](#)  
296 [limiting supply](#)

297 To establish a causal relationship between structural and functional  
298 configurations of the rhizosphere microbiota and plant growth, we performed a plant-

299 soil feedback experiment by growing the 'Elite' variety in soils previously used for the  
300 growth of either a domesticated or wild genotypes amended with a N0% solution  
301 (hereafter 'conditioned soil'). For this analysis we focused on the pair 'Elite' – 'Desert'  
302 as these genotypes displayed the most contrasting microbiota (e.g., Figure 2 and 3).  
303 The obtained conditioned soils were used either in their 'native' form or subjected to  
304 a heat treatment which we hypothesized led to a disruption of the taxonomic and  
305 functional configurations of the microbiota (Figure 7A).

306       Plants grown in the 'heat-treated' soil displayed a growth deficit when  
307 compared to their native counterpart, although these differences were significant  
308 only for the Desert-conditioned soil (two-way ANOVA followed by TukeyHSD test,  
309 Individual *P* values <0.05; Figure 7B). Closer inspection of 19 chemical and physical  
310 parameters characterising the conditioned soils failed to single out a 'Desert-specific'  
311 parameter. Rather, a limited number of properties explained most of the variance  
312 among samples and differentiated between native soil and their heat-treated  
313 counterparts, irrespective of the initial genotype used (Statistical values for the  
314 individual properties: *P* value < 0.01,  $R^2 > 0.8$ ; 5,000 permutations; Figure S6).  
315 Conversely, qPCR analyses of 16S rRNA gene and ITS copy numbers performed at  
316 the end of the cultivation revealed a Desert-mediated impact on the bacterial but not  
317 on the fungal communities populating the conditioned soils (Kruskal-Wallis test  
318 followed by Dunn post-hoc test, *P* value = 0.039, FDR corrected, Figure S7).

319       This observation motivated us to gain insights into the taxonomic composition  
320 of the bacterial communities inhabiting the conditioned soil. A 16S rRNA gene  
321 amplicon library constructed from the samples subjected to the feed-back  
322 experiments and representing additional 6,770,434 sequencing reads revealed a  
323 marked effect of the heat treatment on both the richness and evenness of the

324 rhizosphere communities profiled at the end of cultivation (Kruskal–Wallis followed  
325 by a post-hoc Dunn’s test, Individual  $P$  values  $< 0.05$ ; Figure S8). Likewise, we  
326 observed a compositional shift between heat-treated and native samples  
327 (Permanova,  $R^2_{\text{Treatment}} = 0.289$ ,  $P$  value = 0.0002, 5,000 permutations, Figure 7C). At  
328 the end of cultivation, Bulk soil communities could be separated along the axis  
329 accounting for the second source of variation, while the taxonomic composition of  
330 rhizosphere samples appeared “to converge” to common profiles. Congruently, when  
331 we inspected for the individual bacteria underpinning this diversification, we identified  
332 a phylogenetically diverse group of 10 ASVs, whose enrichment in native samples,  
333 accounting for ~10% of the sequencing reads, discriminated between these latter  
334 and both unplanted soil and heat-treated samples (Wald test,  $P$  value  $< 0.05$ , FDR  
335 corrected, Figure 7D).

336       Taken together, our data suggest that the heat treatment of the soil substrate  
337 led to a scenario comparable to a dysbiosis (43) of the rhizosphere microbiota,  
338 defined by a low-diversity community composition associated to a reduced growth of  
339 the plant host. As the median aboveground dry weight recorded in the feedback  
340 experiment is comparable to the one recorded for barley plants grown for the first  
341 time in Quarryfield soil (compare data of Figure 7B with the ones of Figure 1), the  
342 heat treatment appears to disrupt the capacity of Elite varieties to assemble a  
343 taxonomically diverse bacterial consortium associated to optimum barley growth.

## 344 **Discussion**

345       Our investigation revealed that nitrogen-availability for plant uptake impacts  
346 on the magnitude of the host ‘genotype effect’ on the barley rhizosphere, measured  
347 as number of ASVs differentially recruited between genotypes. This effect was  
348 maximal at N0%, when measurements of residual N in the rhizosphere were 0 mg

349 Kg<sup>-1</sup>, while it was nearly “obliterated” at N100%, with ~200 mg Kg<sup>-1</sup> of residual NO<sub>3</sub> in  
350 the rhizosphere. This is reminiscent of the observation that in *Medicago truncatula*, a  
351 model legume, the host control on the microbiota appear exerted in a nitrogen- and  
352 genotype-dependent manner (44). Although the modulation of the rhizosphere  
353 microbiota in legumes has been associated to plant genes implicated in the  
354 establishment of symbiosis with N<sub>2</sub>-fixing bacteria rather than nitrogen nutritional  
355 status *per se* (45, 46), it is conceivable that this latter impacts on, at least in part,  
356 host-microbe interactions in the barley rhizosphere. This would be congruent with  
357 observation gathered from in rice, a cereal phylogenetically related to barley, in  
358 which the nitrate transporter *NRT1.1B*, emerged as a critical regulator of both  
359 nitrogen use efficiency and microbiota recruitment (47). Likewise, a regulator of  
360 lateral root development, designated *LRT1*, emerged as a determinant of microbiota  
361 recruitment in maize plants exposed to limiting nitrogen supplies (48).

362 Rhizodeposition, i.e., the plant-mediated release of organic compounds in the  
363 rhizosphere, may represent the nexus between plant’s adaptation to limiting  
364 nitrogen supply and microbiota recruitment (16). Consistently, the availability of  
365 organic carbon in barley rhizodeposits is inversely correlated with the amount of  
366 nitrate concentration in shoots (49). As wild and domesticated barley plants display  
367 differential responses to nitrogen fertilisation (50) and a genotype-dependent control  
368 of rhizodeposition (51), the characterisation of primary and secondary metabolites  
369 released in the barley rhizosphere may provide mechanistic insights into microbiota  
370 diversification in barley. However, as recent investigations revealed that the host  
371 genetic control of the rhizosphere microbiota in wild and domesticated barley display  
372 a quantitative inheritance (32, 34), additional experiments with dedicated genetic



373 material are required to untangle the molecular mechanisms linking nitrogen  
374 availability with microbiota diversification.

375 The observation that the magnitude of the host control on the microbiota was  
376 greater when plants were exposed to a nitrogen supply limiting barley growth  
377 motivated us to embark on metagenomic survey of this condition. This approach  
378 revealed that the microbial communities proliferating at the barely root-soil interface  
379 are largely dominated by bacteria: more than 98% of the annotated sequences at  
380 phylum level were classified as bacteria. This is strikingly similar to a previous  
381 investigation conducted in a soil with different physical and chemical characteristics  
382 (30). The dominance of bacterial sequences over other members of the microbiota is  
383 not unusual in soil metagenomes (52), although both the protocol used for microbial  
384 DNA preparation and the databases used for sequencing annotation (53) can  
385 'artificially inflate' the proportion of bacteria among the analysed metagenomes.  
386 Despite this potential caveat, we demonstrated with an independent quantification  
387 that bacterial gene copy number exceeded that from fungal sources by several  
388 orders of magnitude, as previously reported (54, 55). It is however important to  
389 consider that PCR-based approaches may fail to provide an accurate estimation of  
390 fungal biomass due to nuclear exchanges on these filamentous microorganisms  
391 (56).

392 A closer inspection of the bacterial and fungal abundances revealed no  
393 significant differences among samples for Arbuscular Mycorrhizal Fungi (AMF)  
394 symbionts of barley. This apparent discrepancy, in view that AMF can mobilise  
395 nitrogen for plant uptake (57), is however congruent with a previous investigation  
396 conducted with field-grown barley plants, where no genotype effect on AMF root  
397 colonisation was observed regardless of the nitrogen regime (58). Furthermore, this

398 observation is also congruent with the fact that our N0% treatment was associated  
399 with a replete amount of phosphorus for barley growth, a condition known to  
400 suppress AMF colonisation (59). Finally, it is important to mention that the microbiota  
401 inhabiting soils whose pH is below 7, such as 'Quarryfield', are less conducive to  
402 AMF activity than those inhabiting neutral to alkaline substrates (60).

403         For these reasons, we decided to focus on the functional characterisation of  
404 the bacterial component of the microbiota of plants exposed limiting nitrogen  
405 supplies. This allowed us to identify three main GO categories enriched in and  
406 differentiating rhizosphere samples from bulk soil, namely, 'carbohydrate metabolic  
407 process', 'response to chemical' and 'pathogenesis'. Of interest is the GO category  
408 'carbohydrate metabolic process', whose enrichment emerged as both microhabitat-  
409 and genotype-dependent, this is congruent with previous observations that root-  
410 derived dissolved organic carbon and carbohydrate utilisation by soil microbes  
411 display a host genetic component in wild and domesticated barely genotypes (32,  
412 51). Likewise, 'response to chemical' may mirror the adaptation of rhizosphere  
413 communities to plant secondary metabolites, released through rhizodeposition,  
414 capable of selectively impacting on microbial proliferation, as observed in barley (61)  
415 as well as in other cereals (62, 63).

416         Conversely, the GO category 'pathogenesis' appears difficult to reconcile with  
417 the fact that no obvious symptoms of disease were observed in our samples.  
418 However, studies conducted with the model plant *A. thaliana* revealed that  
419 components of host immune system are required for the establishment of a diverse  
420 and functional microbiota at the root-soil interface (64) : this suggests that  
421 endogenous barley microbiota has evolved the capacity of modulating host immune  
422 responses to colonise the rhizosphere. This scenario appears further corroborated

423 by the enrichment of the GO category 'bacterial-type flagellum-dependent cell  
424 motility: despite the fact that molecular components of this machinery have been  
425 considered a paradigmatic epitope of the plant immune system (65), it is now  
426 emerging that their recognition by host plants contribute to signal modulation and  
427 microbiota establishment (66). Similarly, the enrichment of the GO category  
428 'response to reactive oxygen species' in the microbiota of the Elite plants may further  
429 corroborate the role of this class of compounds in modulating plant-associated  
430 bacterial communities (67). A prediction of these observations is that components of  
431 the barley immune system may act as a 'checkpoint' for the taxonomic and functional  
432 composition of the rhizosphere microbiota.

433         Substrate availability and inter-organismal relationships appear to be a  
434 determinant also for the bulk soil communities, as mirrored by the significant  
435 enrichment of the GO terms 'photosynthesis', 'antibiotic biosynthetic process' and  
436 'sporulation'. The absence of a source of organic compounds such as  
437 rhizodeposition creates a niche for the proliferation of CO<sub>2</sub>-fixing microorganisms,  
438 which are ubiquitous in the soil ecosystem (68). Likewise, the enrichment of  
439 'antibiotic biosynthetic process' is congruent with what was observed for agricultural  
440 soils in a cross-microbiome survey (69) while sporulation underpins microbial  
441 adaptation to soil stressful conditions (70). Furthermore, unplanted soil communities  
442 display a differential enrichment for function implicated in phosphorous homeostasis.  
443 As the relative abundances of carbon, nitrogen and phosphorus can be considered  
444 constrained in microbial biomass (71), this observation suggests that, although  
445 phosphorous was applied with the nutrient solution to all specimens, this element  
446 may act as limiting factor predominantly for unplanted soil communities, where the  
447 lack of exudates reduce phosphorous solubility.

448           Taken together, these observations provide mechanistic insights into the  
449 multi-step selection process differentiating rhizosphere communities from bulk soil  
450 ones (4, 27) implicating the modulation of host immune responses as one of the  
451 requirements for bacterial establishment in the rhizosphere of plants exposed to  
452 limiting nitrogen supply. However, as these experiments were performed in a single  
453 soil type, caution is required in extrapolating the results as being indicative of general  
454 phenomena applicable across all soils. Further metagenomics investigations with  
455 plants exposed to replete nitrogen conditions, benefiting also from latest  
456 development in sequencing technologies (72), be required to accurately gauge the  
457 impact of this mineral (or lack thereof) on the functional potential of the barley  
458 microbiota.

459           Despite the fact that the 60 MAGs generated in this work accounted for less  
460 than 10% of the metagenomic reads, these figures are aligned with what has been  
461 recently observed for the rhizosphere of sorghum (73), a cereal phylogenetically  
462 related to barley. This effort not only allowed us to identify genomes belonging to the  
463 dominant phyla of the plant microbiota (i.e., Actinobacteria, Bacteroidetes, Firmicutes  
464 and Proteobacteria) but also members of additional classes, such as an individual  
465 member of the metabolically diverse and yet poorly characterised Zixibacteria  
466 phylum (74-76). Furthermore, mapping reads associated to the GO terms  
467 differentially enriched between microhabitat and genotype, allowed us to gain novel  
468 insights into the relationships between taxonomic and functional composition of the  
469 barley microbiota. For instance, we observed an association between the GO  
470 category 'Carbohydrate metabolic process' and the enrichment of members of the  
471 phylum Bacteroidetes in the 'Elite' rhizosphere. As cell wall features represent a  
472 recruitment cue for the plant microbiota (77), this enrichment may mirror the

473 capacity of degrading complex polysaccharides coded by members of this phylum  
474 (78, 79). The observed genotype-specific enrichment may be further explained by  
475 polymorphisms of barley genes regulating carbohydrate composition in the cell wall  
476 (80, 81).

477         The plant-soil feedback experiment we implemented suggested that, a  
478 functional rhizosphere microbiota is required for optimal barley growth under nutrient  
479 limiting conditions. Although not significantly different, mean values of aboveground  
480 biomass of Elite plants recorded in the 'Desert'-conditioned soil were higher than  
481 recorded from the soil conditioned with the same genotype. Despite phylogenetic  
482 relatedness between condition and focal species in plant-soil feedback experiments  
483 appear unrelated to the strength of the feedback itself (82, 83), compositional shifts  
484 between the conditioned and focal microbiota tend to be associated with enhanced  
485 plant growth (84). However, significant differences in growth were observed when  
486 Elite plants were exposed to heat-inactivated soils which are associated to a  
487 reduction of alpha diversity indices in the rhizosphere, a condition which has  
488 previously linked to stressful soil conditions (84). In turn, this effect could be due to  
489 the treatment on the microbes per se, release of mineral nutrients and/or the  
490 disruption liable carbon compounds released through exudates (85) by conditioning  
491 plants and capable of modulating individual members of the barley microbiota (86).  
492 Unlike recent observations gathered from plant-soil feedback experiments of maize  
493 plants exposed to limiting nitrogen conditions (48), what emerged from our study is  
494 the control exerted by the recipient genotype on the resulting bacterial communities.  
495 This was manifested by the microbiota of plants exposed to either Desert-  
496 conditioned or Elite-conditioned soil converging towards a phylogenetically  
497 conserved bacterial consortium. This is in accordance with data gathered from rice,

498 using both soil feedback experiments (87) and synthetic communities (47), indicating  
499 the host genotype as a driver of a plant-growth promoting microbiota. Likewise, a  
500 recently developed indexed bacterial collection of the barley rhizosphere microbiota  
501 indicated a growth-promotion potential for members of the phyla differentially  
502 recruited in the feedback experiment (88, 89).

503         Taken together, this suggests that the enriched bacteria represent a  
504 consortium of beneficial bacteria required for optimum barley growth whose  
505 recruitment is driven, at least in part, by the host genotype.

## 506 **Conclusions**

507         Our results point at nitrogen availability for plant uptake as inversely  
508 correlated with the magnitude of the host genetic control on the taxonomic  
509 composition of the barley rhizosphere microbiota. Under nitrogen supply limiting  
510 barley growth, wild and domesticated genotypes retain specific functional signatures  
511 which appear to be encoded by distinct bacterial members of the microbiota.  
512 Although we found evidence for nitrogen metabolism executed by these  
513 communities, adaptation to the plant immune system emerged as an additional  
514 recruitment cue for the barley microbiota. Plant-soil feedback experiments suggest  
515 that these distinct compositional and functional configurations of the microbiota can  
516 be “rewired” by the host genotype leading to a recruitment of a consortium of  
517 bacteria putatively required for optimum plant growth. Thanks to recent insights into  
518 barley genes shaping the rhizosphere microbiota (32, 34), these concepts can now  
519 be tested under laboratory and field conditions to expedite the development of plant  
520 varieties combining profiting from improved yields with reduced impacts of N-  
521 fertilisation on the environment.

## 522 **Methods**

### 523 **Experimental design**

524 This investigation consists of three distinct but interconnected experiments. For  
525 each one of them, plants were maintained under controlled conditions in the same  
526 soil type designated 'Quarryfield' (see 'Soil' below) and individual samples were  
527 arranged in a completely randomised design. For the first experiment, we grew and  
528 subjected to 16S rRNA gene amplicon sequencing individual biological replicates  
529 (i.e., pots) Elite, Desert and North as well as three Bulk soil controls exposed to three  
530 different nitrogen treatments, designated N0%; N25% and N100% respectively (see  
531 'Nitrogen treatments' below) according to the following scheme. N0%, number of  
532 sequenced replicates for Desert  $N0\%_{\text{Desert}} = 5$ ;  $N0\%_{\text{North}} = 3$ ;  $N0\%_{\text{Elite}} = 4$ ;  $N0\%_{\text{Bulk}} =$   
533 4. N25%, number of sequenced replicates for Desert  $N25\%_{\text{Desert}} = 5$ ;  $N25\%_{\text{North}} = 3$ ;  
534  $N25\%_{\text{Elite}} = 4$ ;  $N25\%_{\text{Bulk}} = 4$ . N100%, number of sequenced replicates for Desert  
535  $N100\%_{\text{Desert}} = 5$ ;  $N100\%_{\text{North}} = 4$ ;  $N100\%_{\text{Elite}} = 3$ ;  $N100\%_{\text{Bulk}} = 4$ . Alongside these  
536 samples, we prepared two additional Bulk soil controls amended with a plug of the  
537 agar substrate used for seed germination. Total number of sequenced samples = 50.  
538 In the second experiment, we grew and subjected to shotgun metagenomic  
539 sequencing three individual biological replicates (i.e., individual plants in individual  
540 pots) of the genotypes Elite, Desert and North as well as three Bulk soil controls  
541 exposed to N0% treatment. Total number of sequenced samples = 12. In the third  
542 and final experiment, we grew and subjected to 16S rRNA gene amplicon  
543 sequencing individual biological replicates (i.e., individual plants in individual pots) of  
544 the Elite genotype soil controls in Quarryfield soils previously conditioned (see 'Plant-  
545 soil feedback experiment' below) with either the Elite or Desert genotype in a native  
546 form or upon heat treatment. For the former, we contemplated also Bulk soil control

547 pots. Upon discarding pots with no detectable plant growth, the number of  
548 rhizosphere samples exposed to Elite-conditioned soil retained for sequencing was  
549  $\text{Elite-native}_{\text{rhizosphere}} = 11$ ;  $\text{Elite-native}_{\text{Bulk}} = 7$ . Desert-conditioned soil, Desert-  
550  $\text{native}_{\text{rhizosphere}} = 14$ ;  $\text{Desert-native}_{\text{Bulk}} = 9$ . Number of sequenced rhizosphere samples  
551 exposed to the heat treated soil,  $\text{Elite-treated}_{\text{rhizosphere}} = 15$ ;  $\text{Desert-treated}_{\text{rhizosphere}} =$   
552 15. Total number of sequenced samples = 71.

### 553 Soil

554 Soil was sampled from the agricultural research fields of the James Hutton Institute,  
555 Invergowrie, Scotland, UK in the Quarryfield site (56°27'5"N 3°4'29"W). This is a  
556 sandy silt loam soil with a pH of 6.2 and 5% organic matter content. The nitrogen  
557 content of this soil was 1.8 mg Kg<sup>-1</sup> ammonium and 13.5 mg Kg<sup>-1</sup> nitrate. The site  
558 was left unplanted and unfertilised in the three years preceding the investigations.

### 559 Plant material and growth conditions

560 Barley seeds of the domesticated (*Hordeum vulgare* ssp. *vulgare*) and wild  
561 (*Hordeum vulgare* ssp. *spontaneum*) genotypes, the variety 'Morex' (i.e., 'Elite') and  
562 the accessions B1K-12 (i.e., 'Desert') and B1K-31 (i.e., 'North'), respectively, were  
563 surface sterilized as previously reported (90) and germinated on 0.5% agar plates at  
564 room temperature. Seedlings displaying comparable rootlet development were sown  
565 individually in 12-cm diameter pots containing approximately 500g of the 'Quarryfield'  
566 soil, previously sieved to remove stones and large debris. Unplanted pots filled with  
567 the same soil, i.e., bulk soil controls, were maintained in the same glasshouse and  
568 subjected to the same treatments as planted pots. Plantlets one week old were  
569 transferred for two weeks to a growth room at 4 °C for vernalisation. Following the  
570 vernalisation period, plants were maintained in a randomized design in a climatic-  
571 controlled glasshouse at 18/14 °C (day/night) temperature regime with 16 h daylight



572 that was supplemented with artificial lighting to maintain a minimum light intensity of  
573  $200 \mu\text{mol quanta m}^{-2} \text{s}^{-1}$  until early stem elongation (Supplementary Figure 1).  
574 Watering was performed weekly as indicated (see 'Nitrogen treatments' below). Pots  
575 were rotated on weekly basis to minimise potential biases associated to given  
576 positions in the glasshouse.

### 577 Nitrogen treatments

578 The nutrient solutions described in this study, i.e., N100%, N25% and N0%  
579 are reported in Supplementary Table 1. Nutrient solutions were applied at a rate of  
580 25ml per kg of soil each week. Applications started two days after planting, were  
581 interrupted during the vernalisation and reinstated once the plants were transferred  
582 to the growing glasshouse and they reached early stem elongation. Fourteen  
583 treatments were applied with a total of 312.5 mg ( $\text{NO}_3^-$ ); 81.4 mg ( $\text{NH}_4^+$ ) for the  
584 N100% solution, 78.1 mg ( $\text{NO}_3^-$ ); 20.0 mg ( $\text{NH}_4^+$ ) for the N25% solution, and 0 mg of  
585 ( $\text{NO}_3^-$  and  $\text{NH}_4^+$ ) for the N0% solution per pot.

### 586 Plant and Soil Nitrogen determination

587 To assess the N content of the plant, at the time of sampling a newly  
588 expanded leaf was sectioned from every plant, freeze-dried, ball milled, and N  
589 content measured in an Elemental Analyser CE-440 (Exeter Analytical Inc, UK). The  
590 soil from the pots was sieved through a 2mm mesh sieve and mixed. Five grams of  
591 soil was added to 25mL of 1M KCl and the resulting solution mixed in a tube roller for  
592 1hour at ~150 rpm. Supernatant was transferred to 50mL falcon tubes and  
593 centrifuged for 15min at 5,000 rpm, then the supernatant was subject to another  
594 round of centrifugation. The supernatant was transferred to a falcon tube and  
595 analysed with a Discrete Analyser Konelab Aqua 20 (Thermo Fisher, Waltham, USA)  
596 in the analytical services of The James Hutton Institute (Aberdeen, UK). In parallel,

597 ~10 g from the sieved soil was oven dried at 70 °C for 48h and dry weight recorded  
598 to express the analytical results in NO<sub>3</sub><sup>-</sup> and NH<sub>4</sub><sup>+</sup> in mg N kg<sup>-1</sup> of soil.

### 599 Bulk soil and rhizosphere DNA preparation

600 At early stem elongation, plants were excavated from the soil and the stems  
601 were separated from the roots. The uppermost 6 cm of the root system were  
602 detached from the rest of the root corpus and processed for further analysis. The  
603 sampled aboveground material was oven dried at 70°C for 48 hours and the dry  
604 weight recorded. The roots were shaken manually to remove loosely attached soil.  
605 For each barley plant, the seminal root system and the attached soil layer was  
606 collected and placed in a sterile 50ml falcon tube containing 15ml phosphate-  
607 buffered saline solution (PBS). Rhizosphere was operationally defined, for these  
608 experiments, as the soil attached to this part of the roots and extracted through this  
609 procedure. The samples were then vortexed for 30 seconds and transferred to a  
610 second 50ml falcon containing 15ml PBS and vortexed again to ensure the  
611 dislodging and suspension of the rhizosphere. Then, the two falcon tubes with the  
612 rhizosphere suspension were combined and centrifuged at 1,500g for 20 minutes to  
613 precipitate the rhizosphere soil into a pellet, then flash frozen with liquid nitrogen and  
614 stored at -80°C until further analysis. In addition, we incubated water agar plugs (~1  
615 cm<sup>3</sup>) into two unplanted soil pots and we maintained them as control samples among  
616 the experimental pots to monitor the effect of this medium on the soil microbial  
617 communities. DNA was extracted from unplanted soil and rhizosphere samples using  
618 FastDNA™ SPIN Kit for Soil (MP Biomedicals, Solon, USA) according to the  
619 manufacturer's recommendations and stored at -20°C.

## 620 Preparation of 16 rRNA gene amplicon pools

621 The hypervariable V4 region of the small subunit rRNA gene was the target of  
622 amplification using the PCR primer pair 515F (5'-GTGCCAGCMGCCGCGGTAA-3')  
623 and 806R (5'-GGACTACHVGGGTWTCTAAT-3'). The PCR primers had  
624 incorporated an Illumina flow cell adapter at their 5' termini and the reverse primers  
625 contained 12bp unique 'barcode' for simultaneous sequencing of several samples  
626 (91). PCR reactions were performed using 50 ng of metagenomic DNA per sample  
627 using the Kapa HiFi HotStart PCR kit (Kapa Biosystems, Wilmington, USA). The  
628 individual PCR reactions were performed in 20  $\mu$ L final volume and containing 4  $\mu$ L  
629 of 5X Kapa HiFi Buffer, 10  $\mu$ g Bovine Serum Albumin (BSA) (Roche, Mannheim,  
630 Germany), 0.6  $\mu$ L of a 10 mM Kapa dNTPs solution 0.6  $\mu$ L of 10  $\mu$ M solutions of the  
631 515F and 806R PCR primers and 0.25  $\mu$ L of Kapa HiFi polymerase. The reactions  
632 were performed using the following programme programme: 94  $^{\circ}$ C (3 min), followed  
633 by 35 cycles of 98  $^{\circ}$ C (30 s), 50  $^{\circ}$ C (30 s) 72  $^{\circ}$ C (1 min) and a final step of 72  $^{\circ}$ C (10  
634 min). For each primer combination, a no template control (NTC) was included in the  
635 reactions. To minimise amplification biases, PCRs were performed in triplicate and  
636 at least two independent master mixes per barcode were generated (i.e., 6  
637 reactions/sample). PCR reactions were pooled in a barcode-wise manner and an  
638 aliquot of each amplification product inspected on 1.5% agarose gel. Only samples  
639 whose NTCs yielded an undetectable PCR amplification were retained for further  
640 analysis. PCR purification was performed using Agencourt AMPure XP Kit (Beckman  
641 Coulter, Brea, USA) with 0.7  $\mu$ L AmPure XP beads per 1  $\mu$ L of sample. Following  
642 purification, each sample was quantified using PicoGreen (Thermo Fisher Scientific,  
643 Waltham, USA) and individual barcode samples were pooled in an equimolar ratio to  
644 generate amplicons libraries.

## 645 [Illumina 16S rRNA gene amplicon sequencing](#)

646           The pooled amplicon library was submitted to the Genome Technology group,  
647 The James Hutton Institute (Invergowrie, UK) for quality control, processing and  
648 sequencing. Amplicon libraries were amended with 15% of a 4pM phiX solution. The  
649 resulting high-quality libraries were run at 10 pM final concentration on an Illumina  
650 MiSeq system with paired-end 2x 150 bp reads (91) to generate the sequencing  
651 output, the FASTQ files.

## 652 [Amplicon sequencing reads processing](#)

653           Sequence reads were subjected to quality assessment using FastQC (92).  
654 ASVs were then generated using DADA2 version 1.10 (93) and R 3.5.1 (94)  
655 following the basic methodology outlined in the 'DADA2 Pipeline Tutorial' (95). Read  
656 filtering was carried out using the DADA2 paired FastqFilter method, trimming 10bp  
657 of sequence from the 5' of each read using a truncQ parameter of 2 and maxEE of 2.  
658 The remainder of the reads were of high quality consequently no 3' trimming was  
659 deemed necessary. The `dada2::learn_errors()` method was run to determine the  
660 error model with a `MAX_CONSIST` parameter of 20, following which the error model  
661 converged after 9 and 12 rounds for the forward and reverse reads respectively. The  
662 `dada2::dada()` method was then run with the resulting error model to denoise the  
663 reads using sample pooling, followed by read merging, followed by chimera removal  
664 using the consensus method. Taxonomy assignment was carried out using the RDP  
665 Naive Bayesian Classifier through the `dada2::assignTaxonomy()` method, with the  
666 SILVA database (96) version 138, using a minimum bootstrap confidence of 50. The  
667 DADA2 outputs were finally converted to a Phyloseq object (version 1.26.1) (97) .

668           The Phyloseq objects for both the nitrogen gradient and the Plant-soil  
669 feedback experiments were initially merged. Next sequences classified as either

670 'Chloroplast' or 'Mitochondria' were pruned in silico from the merged object.  
671 Likewise, ASVs matching a list of potential contaminants of the lab (98) were  
672 removed as well as ASVs lacking a taxonomic classification at phylum level (i.e.,  
673 'NA'). We further applied an abundance filtering and retained ASVs occurring with at  
674 least 20 reads in 2% of the samples. Finally, the Phyloseq objects were rarefied at  
675 25,000 reads per sample, as recommended for groups with large differences in  
676 library size (99), prior to downstream analyses.

### 677 [Metagenome sequencing, annotation and analysis](#)

678 We generated a new set of 3 bulk soil, and 3 rhizosphere DNA preparations  
679 from each of the three genotypes tested (i.e., 'Desert', 'North' and 'Elite') from  
680 specimens maintained in Quarryfield soil under N0% conditions as described above.  
681 These 12 new preparations were quantified and submitted to the LGC Genomics  
682 sequencing service (Berlin, Germany) where they were used to generate DNA  
683 shotgun libraries using the Ovation Rapid DR Multiplex System 1-96 NuGEN (Leek,  
684 The Netherlands) kit following manufacturer's recommendations. These libraries  
685 were run simultaneously into an individual Illumina NextSeq500 run following  
686 manufacturer's recommendations with the 2 X150bp chemistry and generated a total  
687 of 412,385,413 read pairs. After sequencing read pairs were de-multiplexed  
688 according to the sample's barcodes using the Illumina bcl2fastq2.17.1.14 software.

689 Metagenome analysis was conducted according to the general approach of  
690 Hoyles *et al* (100), using updated tools where appropriate. Sequence reads were  
691 quality assessed using FastQC (101) and quality/adaptor trimmed using TrimGalore  
692 (102), using a quality cut-off of 20, a minimum sequence length of 75bp and  
693 removing terminal N bases. Taxonomic classification of the sequence reads was  
694 carried out using Kraken 2.0.9 (103) with the Kraken PlusPFP database (104), which

695 incorporates protozoa, fungi and plants in addition to the archaea, bacteria and  
696 viruses present in the standard database. Host contamination was removed by  
697 alignment against the Morex V2 barley genome sequence (105) using BWA MEM  
698 (106), and non-aligning reads extracted from the resulting bam files using SAMtools  
699 (107). Metagenome assembly was conducted using MegaHit version 1.2.9 (108) with  
700 the 'meta-large' preset. Predicted proteins were produced from all assemblies using  
701 Prodigal version 2.6.3 (109), which were then clustered using MMseqs2 version  
702 11.e1a1c (110) using the 'easy\_cluster' method. Abundance of predicted proteins in  
703 each sample was determined by alignment of sequence reads against the  
704 representative cDNA sequences of the clusters using BWA MEM and determining  
705 the read counts associated with each sequence using a custom PySAM (111) script.  
706 Functional annotations of the protein sequences were carried out using InterProScan  
707 5-50-84.0 (112) and Interpro version 84.0. GO terms were enumerated using a  
708 custom python script which assessed the number of occurrences of each term in  
709 each sample based upon the previously determined abundance of each annotated  
710 sequence. GO terms were mapped to the metagenomics GO slim subset dated  
711 2020-03-23 (113) using the Map2Slim function of OWLtools (114). Functional  
712 enrichment analysis was carried out using DESeq2 (115) version 1.26.0.

### 713 [Metagenome-Assembled Genomes \(MAGs\)](#)

714 MAGs were created using the MegaHit-assembled contigs described above  
715 using MetaBat2 version 2.15 to create contig bins representing single genomes.  
716 Contig bins were dereplicated using dRep version 3.2.0 followed by decontamination  
717 with Magpurify version 2.1.2 (116). The resulting MAGs were assessed for  
718 completeness and contamination using checkM (117). Annotation of the MAGs was  
719 carried out with Prokka 1.14.6 (118) and InterProScan 5-50-84.0 (112), before

720 taxonomic classification was determined using GTDB-TK version 1.4.0 (119) with  
721 data version r95.

## 722 Nitrogen Cycle Gene Analysis

723 Abundance of nitrogen-cycle genes was determined using the NCycProfiler  
724 tool of NCycDB (120) with the diamond method. Pairwise t-tests were carried  
725 out between the samples of each group within each gene to identify combinations  
726 with statistical differences between samples (Benjamini-Hochberg corrected,  
727 FDR<0.05).

## 728 Plant-soil feedback experiment

729 We grew Desert and the Elite genotypes in 'Quarryfield' soil supplemented  
730 with a N0% nutrient solution under controlled conditions (see Plant growth  
731 conditions). We selected these two genotypes since, in the tested soils, they host a  
732 taxonomic and functional distinct microbiota. At early stem elongation we removed  
733 the plants from the soil, and we harvested the residual soil and kept it separated in a  
734 genotype-wise manner. We reasoned that at the end of cultivation the soils would  
735 have been enriched, at least partially, for specific microbial taxa and functions  
736 associated to either genotype. This residual soil, either in a 'native form', i.e., not  
737 further treated after sampling, or after being exposed to a heat-treatment (126°C for  
738 1 hour, repeated twice at an interval of ~12 hours), was used as a substrate for a  
739 subsequent cultivation of a recipient Elite barley genotype. These plants were  
740 maintained under controlled conditions (see Plant growth conditions) and  
741 supplemented with a N25% solution to compensate for the near complete depletion  
742 of this mineral in the previous cycle of cultivation (compare the  $\text{NH}_4^+$  and  $\text{NO}_3^-$   
743 concentrations of rhizosphere specimens at N0% and N25% in Figure 1). At early  
744 stem elongation plants were harvested and their aboveground biomass determined

745 after drying stems and leaves at 70°C for 48 hours. At the end of each replicated  
746 experiment, the residual soil was collected and subjected to chemical and physical  
747 characterisation (Yara United Kingdom Ltd., Grimsby, United Kingdom).

748 A quantitative real-time polymerase chain reaction assay was used to quantify  
749 the bacterial and fungal DNA fractions in samples from the conditioned soil  
750 experiment as follows. DNA samples were diluted to 10 ng/μl and successively  
751 diluted in a serial manner to a final concentration of 0.01 ng/μl. This final dilution was  
752 used for both the Femto Fungal DNA Quantification Kit and Femto Bacterial DNA  
753 Quantification Kit (Zymo Research) and the quantification was conducted according  
754 to the manufacturers protocol. Briefly, two microliters of the 0.01 ng/μl dilution of  
755 each sample was used together with 18 μl of the corresponding fungal or bacterial  
756 master mix. Two μl of the fungal or bacterial standards were also used to create the  
757 respective quantification curves. DNA samples from the conditioned soil experiment  
758 were randomized in the 96 well plates, using a minimum of 11 biological replicates  
759 per treatment. The quantification was performed in a StepOne thermocycler (Applied  
760 Biosystems by Life Technology) following the cycling protocols of each of the above-  
761 mentioned bacterial and fungal kits.

## 762 [Statistical analyses on univariate dataset and amplicon sequencing](#)

763 Data analysis was performed in R software using a custom script with the  
764 following packages: Phyloseq (97) version 1.30.0 for pre-processing, alpha and beta-  
765 diversity analysis; ggplot2 version 3.3.0 (121) for data visualisations; Vegan version  
766 2.5-6 (122) for statistical analysis of beta-diversity; PMCMR version 4.3 (123) for  
767 non-parametric analysis of variance and Agricolae for Tukey post hoc test (124). For  
768 any univariate dataset used (e.g., aboveground biomass) the normality of the data's  
769 distribution was checked using Shapiro–Wilk test. For datasets normally distributed,



770 the significance of the imposed comparisons was assessed by an ANOVA test  
771 followed by a Tukey post hoc test. Non-parametric analysis of variance were  
772 performed by Kruskal-Wallis Rank Sum Test, followed by Dunn's post hoc test with  
773 the functions `kruskal.test` and the `posthoc.kruskal.dunn.test`, respectively, from the  
774 package `PMCMR`. We used Spearman's rank correlation to determine the similarity  
775 between unplanted soil profiles and bulk soil samples amended with water agar  
776 plugs (Table S2). The analysis of ASVs differentially enriched was performed a)  
777 between individual genotypes and bulk soil samples to assess the sample effect and  
778 b) between the rhizosphere samples to assess the genotype effect. The genotype  
779 effect was further corrected for a microhabitat effect (i.e., for each genotype, only  
780 ASVs enriched against both unplanted soil and at least another barley genotype  
781 were retained for further analysis). The analysis was performed using the `DESeq2`  
782 package (115) version 1.26.0 consisting of a moderated shrinkage estimation for  
783 dispersions and fold changes as an input for a pair-wise Wald test. This method  
784 identifies the number of ASVs significantly enriched in pair-wise comparisons with an  
785 adjusted *P* value (False Discovery Rate,  $FDR < 0.05$ ). This method was selected  
786 since it outperforms other hypothesis-testing approaches when data are not normally  
787 distributed and a limited number of individual replicates per condition are available  
788 (99).  
789  
790

791 **Figures and Tables**

792

793 **Table 1: Metagenomic Assembly statistics**

|                             |                |
|-----------------------------|----------------|
| Assembly Length             | 12841009562 bp |
| Number Contigs              | 21005959       |
| Longest Contig              | 579848 bp      |
| N50                         | 627 bp         |
| L50                         | 5320588 bp     |
| Predicted Protein Sequences | 26740734       |
| Protein Sequence Clusters   | 10554104       |

**Table 2: GO Slim Terms with Significantly Differential Abundance**

| Accession  | GO Term                                          | Bulk-Desert |                        | Bulk-North |                        | Bulk-Elite |                        | Desert-Elite            |                        | North-Elite |     | Desert-North            |                        |
|------------|--------------------------------------------------|-------------|------------------------|------------|------------------------|------------|------------------------|-------------------------|------------------------|-------------|-----|-------------------------|------------------------|
|            |                                                  | log2 FC     | FDR                    | log2 FC    | FDR                    | log2 FC    | FDR                    | log2 FC                 | FDR                    | log2 FC     | FDR | log2 FC                 | FDR                    |
| GO:0005975 | carbohydrate metabolic process                   | 0.23        | 3.59x10 <sup>-07</sup> | 0.29       | 2.42x10 <sup>-11</sup> | 0.34       | 1.03x10 <sup>-14</sup> | 1.05x10 <sup>-01</sup>  | 3.99x10 <sup>-02</sup> | -           | NS  | 6.37x10 <sup>-02</sup>  | 8.28x10 <sup>-01</sup> |
| GO:0007155 | cell adhesion                                    | -0.06       | 6.62x10 <sup>-01</sup> | 0.03       | 8.11x10 <sup>-01</sup> | 0.26       | 2.17x10 <sup>-02</sup> | 3.23x10 <sup>-01</sup>  | 1.84x10 <sup>-02</sup> | -           | NS  | 8.97x10 <sup>-02</sup>  | 9.10x10 <sup>-01</sup> |
| GO:0009405 | Pathogenesis                                     | 1.21        | 4.64x10 <sup>-05</sup> | 1.25       | 2.65x10 <sup>-05</sup> | 1.80       | 2.66x10 <sup>-10</sup> | 5.88x10 <sup>-01</sup>  | 9.05x10 <sup>-02</sup> | -           | NS  | 3.26x10 <sup>-02</sup>  | 9.79x10 <sup>-01</sup> |
| GO:0009628 | response to abiotic stimulus                     | 1.33        | 4.65x10 <sup>-04</sup> | 1.45       | 1.03x10 <sup>-04</sup> | 1.70       | 3.20x10 <sup>-06</sup> | 3.66x10 <sup>-01</sup>  | 4.26x10 <sup>-01</sup> | -           | NS  | 1.22x10 <sup>-01</sup>  | 9.79x10 <sup>-01</sup> |
| GO:0015979 | Photosynthesis                                   | -0.84       | 1.18x10 <sup>-04</sup> | -0.89      | 4.13x10 <sup>-05</sup> | -1.20      | 1.03x10 <sup>-08</sup> | -3.60x10 <sup>-01</sup> | 1.69x10 <sup>-01</sup> | -           | NS  | -4.63x10 <sup>-02</sup> | 9.79x10 <sup>-01</sup> |
| GO:0016226 | iron-sulfur cluster assembly                     | -0.16       | 7.53x10 <sup>-06</sup> | -0.16      | 1.55x10 <sup>-06</sup> | -0.21      | 1.70x10 <sup>-10</sup> | -5.77x10 <sup>-02</sup> | 1.69x10 <sup>-01</sup> | -           | NS  | -8.71x10 <sup>-03</sup> | 9.79x10 <sup>-01</sup> |
| GO:0016310 | Phosphorylation                                  | -0.14       | 3.24x10 <sup>-02</sup> | -0.18      | 6.04x10 <sup>-03</sup> | -0.18      | 5.10x10 <sup>-03</sup> | -3.45x10 <sup>-02</sup> | 6.95x10 <sup>-01</sup> | -           | NS  | -3.66x10 <sup>-02</sup> | 9.79x10 <sup>-01</sup> |
| GO:0017000 | antibiotic biosynthetic process                  | -0.24       | 2.72x10 <sup>-03</sup> | -0.15      | 6.67x10 <sup>-02</sup> | -0.15      | 4.81x10 <sup>-02</sup> | 8.49x10 <sup>-02</sup>  | 4.08x10 <sup>-01</sup> | -           | NS  | 9.06x10 <sup>-02</sup>  | 8.28x10 <sup>-01</sup> |
| GO:0019222 | regulation of metabolic process                  | -0.21       | 2.72x10 <sup>-03</sup> | -0.21      | 3.20x10 <sup>-03</sup> | -0.36      | 1.13x10 <sup>-07</sup> | -1.42x10 <sup>-01</sup> | 8.09x10 <sup>-02</sup> | -           | NS  | 5.68x10 <sup>-03</sup>  | 9.79x10 <sup>-01</sup> |
| GO:0042221 | response to chemical                             | 0.61        | 7.40x10 <sup>-11</sup> | 0.61       | 2.42x10 <sup>-11</sup> | 0.76       | 5.61x10 <sup>-17</sup> | 1.51x10 <sup>-01</sup>  | 1.69x10 <sup>-01</sup> | -           | NS  | 5.19x10 <sup>-03</sup>  | 9.79x10 <sup>-01</sup> |
| GO:0043934 | Sporulation                                      | -0.48       | 2.08x10 <sup>-05</sup> | -0.57      | 2.62x10 <sup>-07</sup> | -0.81      | 4.76x10 <sup>-14</sup> | -3.31e-01               | 1.84x10 <sup>-02</sup> | -           | NS  | -9.21x10 <sup>-02</sup> | 9.10x10 <sup>-01</sup> |
| GO:0065003 | protein-containing complex assembly              | 0.59        | 4.67x10 <sup>-07</sup> | 0.60       | 2.62x10 <sup>-07</sup> | 0.53       | 3.29x10 <sup>-06</sup> | -5.78e-02               | 6.95x10 <sup>-01</sup> | -           | NS  | 7.51x10 <sup>-03</sup>  | 9.79x10 <sup>-01</sup> |
| GO:0071840 | cellular component organization or biogenesis    | 0.12        | 1.90x10 <sup>-02</sup> | 0.18       | 3.06x10 <sup>-04</sup> | 0.25       | 5.59x10 <sup>-07</sup> | 1.22e-01                | 3.99x10 <sup>-02</sup> | -           | NS  | 5.89x10 <sup>-02</sup>  | 8.28x10 <sup>-01</sup> |
| GO:0071973 | bacterial-type flagellum-dependent cell motility | 0.75        | 3.82x10 <sup>-13</sup> | 0.71       | 3.51x10 <sup>-12</sup> | 0.86       | 1.70x10 <sup>-17</sup> | 1.07x10 <sup>-01</sup>  | 4.26x10 <sup>-01</sup> | -           | NS  | -3.68x10 <sup>-02</sup> | 9.79x10 <sup>-01</sup> |

Significantly differentially abundant GO Slim terms (Benjamini-Hochberg corrected FDR<0.05, Wald test) with log2 fold-change > ±0.20 in at least one comparison. NS=Not Significant

bioRxiv preprint doi: <https://doi.org/10.1101/605204>; this version posted September 23, 2022. The copyright holder for this preprint (which was not certified by peer review) is the author/funder, who has granted bioRxiv a license to display the preprint in perpetuity. It is made available under aCC-BY 4.0 International license.

1 **Figure 1: The nitrogen content of ‘Quarryfield’ soil limits barley growth.** Cumulative  
2 data gathered at early stem elongation in the tested barley genotypes subjected to three  
3 nitrogen fertilization treatments (N0%, N25% and N100%) as indicated in the x-axis of  
4 each panel. Individual dots depict individual biological replicates. **A)** aboveground biomass  
5 of the tested plants. **B)** nitrogen content in the aboveground tissues of the tested plants.  
6 Residual concentration of **C)** ammonium and **D)** nitrate retrieved from rhizospheric soil at  
7 the time of sampling. Lowercase letters denote significant differences at  $P$  value  $<0.05$  in a  
8 Kruskal–Wallis non-parametric analysis of variance followed by Dunn’s post hoc test.

9 **Figure 2 Nitrogen availability modulates the host genetic control of the rhizosphere**  
10 **bacterial microbiota.** **A)** Canonical analysis of Principal Coordinates computed on Bray-  
11 Curtis dissimilarity matrix. Individual shapes in the plot denote individual biological  
12 replicates whose colour and shape depict sample type and nitrogen treatment,  
13 respectively, as indicated in the bottom part of the figure. Numbers in the plots depict the  
14 proportion of variance ( $R^2$ ) explained by the factors ‘Sample’, ‘Treatment’ and their  
15 interactions, respectively. Asterisks associated to the  $R^2$  value denote its significance,  $P$   
16 value ‘Sample’ = 0.0002,  $P$  value ‘Treatment’ = 0.0004,  $P$  value ‘Sample \* Treatment’ =  
17 0.0434; Adonis test 5,000 permutations. **B)** Horizontal blue bars denote the number of  
18 ASVs differentially enriched (Wald test, Individual  $P$  values  $<0.05$ , FDR corrected between  
19 the elite and two wild barley genotypes at different nitrogen treatments as recapitulated by  
20 the shape and colour scheme. Vertical bars depict the number of differentially enriched  
21 ASVs unique for or shared among two or more pair-wise comparisons highlighted by the  
22 interconnected dots underneath the vertical bars.

23 **Figure 3 Bacteria dominate the metagenome of barley plants exposed to limiting**  
24 **nitrogen supplies.** Dots depict sequencing reads assigned to **A)** Bacteria and Fungi or **B)**  
25 proportion of fungal sequencing reads classified as ‘Glomeromycetes’ in the individual  
26 replicated of the metagenomic survey in the indicated samples. In **C)** and **D)** cluster

27 dendrograms constructed using Bray-Curtis dissimilarity matrices of the metagenomic  
28 sequencing reads (counts per million) assigned to family level in Bacteria and Fungi,  
29 respectively. Individual shapes denote individual biological replicates whose colour depict  
30 sample type as indicated in the bottom part of the figure. Numbers associated to each  
31 dendrogram depict the proportion of variance ( $R^2$ ) explained by the factor 'Sample', in  
32 Bacteria or Fungi, respectively. Asterisks associated to the  $R^2$  value denote its significance,  
33  $P$  value 'Sample' in Bacteria = 0.0012;  $P$  value 'Sample' in Fungi = 0.0004; Adonis test  
34 5,000 permutations.

35 **Figure 4 The microhabitat and the host genotype fine-tune the functional potential**  
36 **of the barley microbiota. A)** Principal Component Analysis computed on annotated reads  
37 mapped to the terms of Gene Ontology Slim database. Individual shapes in the plot denote  
38 individual biological replicates whose colour depict sample type as indicated in the bottom  
39 of the panel. The largest shape of each sample type indicates the centroid. **B)** PCA  
40 loadings representing the GO Slim terms sustaining the ordination. The top 20 GO Slim  
41 terms were filtered for those with a  $\log_2$  fold-change of  $> \pm 0.2$  in at least one comparison  
42 (Wald test, Individual  $P$  values  $< 0.05$ , FDR corrected). Arrows point at the direction of  
43 influence of a given term in the various samples, their length and colour being proportional  
44 to the weight they contribute to each PC as indicated in the key underneath the plot.

45 **Figure 5 Partitioning of the functional potential of the rhizosphere microbiota among**  
46 **its individual members A)** Core gene based phylogenetic tree of the 60 MAGs identified  
47 in this study. Branch labels represent bootstrap values (100 bootstrap iterations) **B)**  
48 Taxonomic affiliation of the individual MAGs obtained using GTDB-TK, highlighting colours  
49 denote class affiliation as indicated in panel in the left end-side of the figure. **C)** Distribution  
50 of sequences mapping to the top 10 GO Slim categories significantly enriched in the  
51 rhizosphere samples compared to Bulk soil controls (Wald test, Individual  $P$  values  $< 0.05$ ,

52 FDR corrected). The size of the dots denotes the relative abundance of each annotated  
53 term in a given genome.

#### 54 **Figure 6 Co-occurrence of individual GO Terms in the barley rhizosphere**

55 **metagenome.** Pair-wise correlation among the abundances of individual GO terms  
56 identified in the MAGs. Individual numbers in the plot depict Pearson's  $r$  correlation  
57 coefficient. This coefficient is reported for only pair-wise correlations displaying individual  $P$   
58 values  $< 0.05$ .

#### 59 **Figure 7 A phylogenetically diverse bacterial consortium is associated to optimum** 60 **barley growth in plants exposed to nitrogen-limiting conditions. A)** Schematic

61 representation of the implemented plant-soil feedback experiments. **B)** Above-ground  
62 biomass of 'Elite' barley plants sampled at early stem elongation in conditioned soil in  
63 either native or heat-treated form as indicated by colour-coding at the bottom of the figure.  
64 Dots depict individual biological replicates and letters denote significant differences at  $P$   
65 value  $< 0.05$  in a two-way analysis of variance followed by a Tukey's post hoc test. **C)**  
66 Canonical analysis of Principal Coordinates computed on Bray-Curtis dissimilarity matrix.  
67 Individual shapes in the plot denote individual biological replicates whose colour depict  
68 sample type and treatment. i.e., native or heat-treated, as indicated in the bottom part of  
69 the figure. The number in the plot depict the proportion of variance ( $R^2$ ) explained by the  
70 factor, 'Treatment' while the asterisks define its significance,  $P$  value 'Treatment' = 0.0004;  
71 Adonis test 5,000 permutations. **D)** Cumulative abundances, expressed as number of  
72 sequencing reads, assigned to each of the bacteria significantly enriched in and  
73 discriminating between rhizosphere of plants grown in native, conditioned soil versus both  
74 Bulk and heat-treated conditioned soils (Wald test, Individual  $P$  values  $< 0.05$ , FDR  
75 corrected). Each vertical bar corresponds to an individual biological replicate of a sample  
76 and treatment depicted underneath the graph. Each segment in the vertical bar depicts the

77 sequencing reads assigned to an individual bacterial ASV, color-coded according to its  
78 affiliation at class level.

## 79 **Supplemental Material**

80 **Table S1.** Composition of the nutrient solutions used in this study. The solution was  
81 applied with watering of the plants at a rate of 25 ml of the nutrient solution per Kg of soil.

82 **Table S2.** Spearman's rank correlations computed between the average relative  
83 abundances (phylum level) of the communities retrieved from unplanted soil samples and  
84 unplanted soil amended with "0.5% agar plugs".

85 **Figure S1: Barley development at the time of sampling.** Representative photographs  
86 of the indicated genotypes subjected to different nitrogen treatment taken at the time of  
87 sampling. Scale bar = 5 cm.

88 **Figure S2: Schematic representation of the metagenomics computational pipeline.**

89 **Figure S3: Nitrogen biogeochemical cycle genes at the barley root-soil interface.**

90 Individual panels depict metagenomics sequencing reads assigned to a given gene. Dots  
91 depict individual biological replicated color-coded according to sample affiliation as  
92 indicated at the bottom of the panels. Only genes displaying a significant difference  
93 between samples are presented (pairwise t-tests, individual P value <0.05, BH corrected).  
94 Individual gene abbreviations: gdh, Glutamate dehydrogenase; hao, Hydroxylamine  
95 dehydrogenase; napA, Periplasmic nitrate reductase; narB Assimilatory nitrate reductase;  
96 narC Cytochrome b-561; nirA, Ferredoxin-nitrite reductase; nirB, Nitrite reductase (NADH)  
97 large subunit; norB, Nitric oxide reductase subunit B; nosZ, Nitrous-oxide reductase; NR,  
98 Nitrate reductase (NAD(P)H); nrfA, Nitrite reductase (cytochrome c-552); ureA, Urease  
99 subunit gamma; ureB Urease subunit beta.

100 **Figure S4: K-Means clustering of GO annotations in metagenomic samples.** These  
101 panels indicate the number of rlog-transformed counts for each cluster centroid resulting  
102 from K-means clustering (10 clusters, maximum of 40 iterations) which reveals consistent

103 patterns amongst replicates providing a finer-grained view of functional enrichment.

104 Cluster 5, for example contains GO terms which are increased in abundance in both

105 desert and north sample relative to bulk soil, with even higher abundance in elite samples.

106 Members of cluster 6 are similarly increased in abundance in all planted samples relative

107 to bulk soil. Cluster membership, including DESeq2 differential abundance analysis results

108 are presented in Dataset S1.

109 **Figure S5: MAGs differential enrichment across microhabitats and genotypes.** Each

110 panel denotes a pair-wise comparison between bulk soil and rhizosphere (top panels) or

111 between genotypes within the rhizosphere microhabitat (bottom panels). Differential

112 enrichments expressed a log<sub>2</sub> fold change, with enrichment in the first term of comparison

113 depicted by negative fold change (Wald test, Individual P values <0.05, FDR corrected).

114 **Figure S6: Impact of the heat treatment on soil chemical and physical parameters.**

115 Non-metric multidimensional scaling illustrating the relationships of soil samples from the

116 indicated sample type. Arrows depict the most significant parameters ( $R^2 > 0.83$ ,  $P$  value

117 <0.001) explaining the ordination, namely the concentration of ammonium, phosphorus,

118 manganese, sulphur, sodium, iron, copper, zinc and the pH. Arrows point at the direction

119 of change while their length is proportional to the correlation between the ordination and

120 the indicated variables.

121 **Figure S7: Bacterial and fungal DNA concentration in samples from the plant-soil**

122 **feedback experiment.** Boxplots depicting the logarithm (base 2) of the concentration

123 (expressed as copy numbers per 2 $\mu$ l of input DNA) of the A) 16 rRNA gene or B) ITS

124 sequences retrieved from the plant-soil feedback experiment. Individual dots depict

125 individual biological replicated. Different letters denote significantly different groups

126 (Kruskal–Wallis and post-hoc Dunn’s test,  $P$  value = 0.039); ns no significant differences.

127 **Figure S8: The heat treatment impacts on microbiota richness and evenness.** Strip

128 chart depicting A) number of ASVs or B) Shannon indexes of the samples subjected to the



129 plant-soil feedback experiments. Individual dots depict individual biological replicates  
130 whose colour reflects the sample type and the treatment indicated at the bottom of the  
131 figure. Different letters denote significantly different groups (Kruskal–Wallis and post-hoc  
132 Dunn’s test,  $P$  value < 0.05).

133 **Dataset S1.** Analysis of individual GO-terms identified on the top 10 clusters  
134 differentiating between samples and arranged as individual spreadsheets. For each cluster  
135 we determined the significance of individual terms in pair-wise comparisons between bulk  
136 soil and rhizosphere samples and, within the latter, between genotypes (Wald test,  
137 Individual  $P$  values <0.05, FDR corrected).

138

139

## 140 **Acknowledgements**

141 We are particularly grateful to Dr Eyal Fridman (ARO, Bet Dagan, Israel) for  
142 providing us with the B1K seeds used in this study. We thank Lawrie Brown (The James  
143 Hutton Institute, Invergowrie) for advising us in the preparation and application of the  
144 nutrient solutions, Niamh Johnston (Nuffield Research Placements Student) and Jim Wilde  
145 (The James Hutton Institute, Invergowrie) for the technical assistance during the feedback  
146 experiment. We thank LGC genomics GmbH (Berlin, Germany) for generating the shot gun  
147 metagenomics reads. For the purpose of open access, the authors have applied a CC BY  
148 public copyright licence to any Author Accepted Manuscript version arising from this  
149 submission.

## 150 **Funding**

151 The experimental work presented in this manuscript was supported by a Royal  
152 Society of Edinburgh/Scottish Government Personal Research Fellowship co-funded by  
153 Marie Curie Actions, a Carnegie Trust for the Universities of Scotland Research Incentive  
154 grant (RIG007411) and an UK Research and Innovation grant (BB/S002871/1) awarded  
155 to DB. RAT was supported by a Scottish Food Security Alliance-Crops studentship,  
156 provided by the University of Dundee, the University of Aberdeen, and the James Hutton  
157 Institute. RK was partially supported by a British Society for Plant Pathology MSc/MRes  
158 Bursary Scheme. The metagenomic data analysis was supported by the H2020

159 Innovation Action 'CIRCLES' (European Commission, Grant agreement 818290) awarded  
160 to the University of Dundee.

### 161 **Availability of data and materials**

162 The sequences generated in the 16S rRNA gene sequencing survey and the raw  
163 metagenomics reads reported in this study are deposited in the European Nucleotide  
164 Archive (ENA) under the accession numbers PRJEB30847, PRJEB54872 and  
165 PRJEB54873. Individual metagenomes are retrievable on the MG-RAST server under the  
166 IDs mgm4798244.3; mgm4798274.3; mgm4798349.3; mgm4798388.3; mgm4798507.3;  
167 mgm4798563.3; mgm4798641.3; mgm4798894.3; mgm4799467.3; mgm4799972.3;  
168 mgm4801514.3; mgm4801719.3.

169 The scripts used to analyse the data and generate the figures of this study are  
170 available at <https://github.com/BulgarelliD-Lab/Barley-NT-2020>

### 171 **Authors' contribution**

172 The study was conceived by RAT and DB with critical inputs from EP and LB. RAT,  
173 AMC, CEM, KBC and RK performed the experiments. JM and PH generated the 16S  
174 rRNA gene sequencing reads. JA conceived the metagenomic analysis with inputs from  
175 MB and GT. RAT, SRA, AMC, CEM, JA and DB analysed the data. All authors critically  
176 reviewed and edited the manuscript and approved its publication.

177

178 **References**

- 179 1. Tilman D, Cassman KG, Matson PA, Naylor R, Polasky S. 2002. Agricultural  
180 sustainability and intensive production practices. *Nature* 418:671-677.
- 181 2. Tilman D, Balzer C, Hill J, Befort BL. 2011. Global food demand and the sustainable  
182 intensification of agriculture. *Proceedings of the national academy of sciences*  
183 108:20260-20264.
- 184 3. Foley JA, Ramankutty N, Brauman KA, Cassidy ES, Gerber JS, Johnston M,  
185 Mueller ND, O'Connell C, Ray DK, West PC. 2011. Solutions for a cultivated planet.  
186 *Nature* 478:337-342.
- 187 4. Bulgarelli D, Schlaeppi K, Spaepen S, Van Themaat EVL, Schulze-Lefert P. 2013.  
188 Structure and functions of the bacterial microbiota of plants. *Annual review of plant*  
189 *biology* 64:807-838.
- 190 5. Turner TR, James EK, Poole PS. 2013. The plant microbiome. *Genome biology*  
191 14:1-10.
- 192 6. Chialva M, Lanfranco L, Bonfante P. 2022. The plant microbiota: Composition,  
193 functions, and engineering. *Current Opinion in Biotechnology* 73:135-142.
- 194 7. Lugtenberg B, Kamilova F. 2009. Plant-growth-promoting rhizobacteria. *Annual*  
195 *review of microbiology* 63:541-556.
- 196 8. Schlaeppi K, Bulgarelli D. 2015. The plant microbiome at work. *Molecular Plant-*  
197 *microbe interactions* 28:212-217.
- 198 9. Elser J, Bennett E. 2011. A broken biogeochemical cycle. *Nature* 478:29.
- 199 10. Erisman JW, Galloway JN, Seitzinger S, Bleeker A, Dise NB, Petrescu AR, Leach  
200 AM, de Vries W. 2013. Consequences of human modification of the global nitrogen  
201 cycle. *Philosophical Transactions of the Royal Society B: Biological Sciences*  
202 368:20130116.
- 203 11. Hodge A, Fitter AH. 2010. Substantial nitrogen acquisition by arbuscular  
204 mycorrhizal fungi from organic material has implications for N cycling. *Proceedings*  
205 *of the National Academy of Sciences* 107:13754-13759.
- 206 12. Gardner JB, Drinkwater LE. 2009. The fate of nitrogen in grain cropping systems: a  
207 meta-analysis of 15N field experiments. *Ecological applications* 19:2167-2184.
- 208 13. Paterson E. 2003. Importance of rhizodeposition in the coupling of plant and  
209 microbial productivity. *European journal of soil science* 54:741-750.
- 210 14. Paterson E, Midwood AJ, Millard P. 2009. Through the eye of the needle: a review  
211 of isotope approaches to quantify microbial processes mediating soil carbon  
212 balance. *New Phytologist* 184:19-33.
- 213 15. Murphy CJ, Baggs EM, Morley N, Wall DP, Paterson E. 2015. Rhizosphere priming  
214 can promote mobilisation of N-rich compounds from soil organic matter. *Soil Biology*  
215 *and Biochemistry* 81:236-243.
- 216 16. Terrazas RA, Giles C, Paterson E, Robertson-Albertyn S, Cesco S, Mimmo T, Pii Y,  
217 Bulgarelli D. 2016. Plant-microbiota interactions as a driver of the mineral turnover  
218 in the rhizosphere. *Advances in applied microbiology* 95:1-67.
- 219 17. Hacquard S, Garrido-Oter R, González A, Spaepen S, Ackermann G, Lebeis S,  
220 McHardy AC, Dangl JL, Knight R, Ley R. 2015. Microbiota and host nutrition across  
221 plant and animal kingdoms. *Cell host & microbe* 17:603-616.
- 222 18. Purugganan MD. 2019. Evolutionary insights into the nature of plant domestication.  
223 *Current Biology* 29:R705-R714.
- 224 19. Pérez-Jaramillo JE, Carrión VJ, de Hollander M, Raaijmakers JM. 2018. The wild  
225 side of plant microbiomes. *Microbiome* 6:1-6.
- 226 20. Pérez-Jaramillo JE, Mendes R, Raaijmakers JM. 2016. Impact of plant  
227 domestication on rhizosphere microbiome assembly and functions. *Plant molecular*  
228 *biology* 90:635-644.

- 229 21. Escudero-Martinez C, Bulgarelli D. 2019. Tracing the evolutionary routes of plant–  
230 microbiota interactions. *Current opinion in microbiology* 49:34-40.
- 231 22. Pérez-Jaramillo JE, Carrión VJ, Bosse M, Ferrão LF, De Hollander M, Garcia AA,  
232 Ramírez CA, Mendes R, Raaijmakers JM. 2017. Linking rhizosphere microbiome  
233 composition of wild and domesticated *Phaseolus vulgaris* to genotypic and root  
234 phenotypic traits. *The ISME journal* 11:2244-2257.
- 235 23. Wipf HM, Coleman-Derr D. 2021. Evaluating domestication and ploidy effects on  
236 the assembly of the wheat bacterial microbiome. *Plos one* 16:e0248030.
- 237 24. Leff JW, Lynch RC, Kane NC, Fierer N. 2017. Plant domestication and the  
238 assembly of bacterial and fungal communities associated with strains of the  
239 common sunflower, *Helianthus annuus*. *New Phytologist* 214:412-423.
- 240 25. Zachow C, Müller H, Tilcher R, Berg G. 2014. Differences between the rhizosphere  
241 microbiome of *Beta vulgaris* ssp. *maritima*—ancestor of all beet crops—and modern  
242 sugar beets. *Frontiers in Microbiology* 5:415.
- 243 26. Chaluvadi S, Bennetzen JL. 2018. Species-associated differences in the below-  
244 ground microbiomes of wild and domesticated *Setaria*. *Frontiers in plant science*  
245 9:1183.
- 246 27. Edwards J, Johnson C, Santos-Medellín C, Lurie E, Podishetty NK, Bhatnagar S,  
247 Eisen JA, Sundaresan V. 2015. Structure, variation, and assembly of the root-  
248 associated microbiomes of rice. *Proceedings of the National Academy of Sciences*  
249 112:E911-E920.
- 250 28. Cordovez V, Dini-Andreote F, Carrión VJ, Raaijmakers JM. 2019. Ecology and  
251 evolution of plant microbiomes. *Annual review of microbiology* 73:69-88.
- 252 29. Newton AC, Flavell AJ, George TS, Leat P, Mullholland B, Ramsay L, Revoredo-  
253 Giha C, Russell J, Steffenson BJ, Swanston JS, Thomas WTB, Waugh R, White PJ,  
254 Bingham IJ. 2011. Crops that feed the world 4. Barley: a resilient crop? Strengths  
255 and weaknesses in the context of food security. *Food Security* 3:141.
- 256 30. Bulgarelli D, Garrido-Oter R, Münch PC, Weiman A, Dröge J, Pan Y, McHardy AC,  
257 Schulze-Lefert P. 2015. Structure and function of the bacterial root microbiota in  
258 wild and domesticated barley. *Cell host & microbe* 17:392-403.
- 259 31. Rodrigo AT, Katharin B-C, Morris J, Hedley PE, Russell J, Paterson E, Baggs EM,  
260 Eyal F, Davide B. 2020. A footprint of plant eco-geographic adaptation on the  
261 composition of the barley rhizosphere bacterial microbiota. *Scientific Reports*  
262 (Nature Publisher Group) 10.
- 263 32. Mwafulirwa L, Baggs EM, Russell J, Hackett CA, Morley N, De la Fuente Cantó C,  
264 Paterson E. 2021. Identification of barley genetic regions influencing plant–microbe  
265 interactions and carbon cycling in soil. *Plant and Soil*:1-18.
- 266 33. Maver M, Escudero-Martinez C, Abbott J, Morris J, Hedley PE, Mimmo T, Bulgarelli  
267 D. 2021. Applications of the indole-alkaloid gramine modulate the assembly of  
268 individual members of the barley rhizosphere microbiota. *PeerJ* 9:e12498.
- 269 34. Escudero-Martinez C, Coulter M, Terrazas RA, Foito A, Kapadia R, Pietrangelo L,  
270 Maver M, Sharma R, Aprile A, Morris J. 2021. Identifying Plant Genes Shaping  
271 Microbiota Composition in the Barley Rhizosphere. *bioRxiv*.
- 272 35. Glaser K, Hackl E, Inselsbacher E, Strauss J, Wanek W, Zechmeister-Boltenstern  
273 S, Sessitsch A. 2010. Dynamics of ammonia-oxidizing communities in barley-  
274 planted bulk soil and rhizosphere following nitrate and ammonium fertilizer  
275 amendment. *FEMS Microbiology Ecology* 74:575-591.
- 276 36. Saghaï A, Wittorf L, Philippot L, Hallin S. 2022. Loss in soil microbial diversity  
277 constrains microbiome selection and alters the abundance of N-cycling guilds in  
278 barley rhizosphere. *Applied Soil Ecology* 169:104224.
- 279 37. Hübner S, Höffken M, Oren E, Haseneyer G, Stein N, Graner A, Schmid K, Fridman  
280 E. 2009. Strong correlation of wild barley (*Hordeum spontaneum*) population

- 281 structure with temperature and precipitation variation. *Molecular ecology* 18:1523-  
282 1536.
- 283 38. Hübner S, Bdolach E, Ein-Gedy S, Schmid K, Korol A, Fridman E. 2013. Phenotypic  
284 landscapes: phenological patterns in wild and cultivated barley. *Journal of*  
285 *evolutionary biology* 26:163-174.
- 286 39. Hübner S, Günther T, Flavell A, Fridman E, Graner A, Korol A, Schmid KJ. 2012.  
287 Islands and streams: clusters and gene flow in wild barley populations from the  
288 Levant. *Molecular ecology* 21:1115-1129.
- 289 40. Robertson-Albertyn S, Alegria Terrazas R, Balbirnie K, Blank M, Janiak A, Szarejko  
290 I, Chmielewska B, Karcz J, Morris J, Hedley PE. 2017. Root hair mutations displace  
291 the barley rhizosphere microbiota. *Frontiers in plant science* 8:1094.
- 292 41. Hoagland DR, Arnon DI. 1950. The water-culture method for growing plants without  
293 soil. *Circular California agricultural experiment station* 347.
- 294 42. Delogu G, Cattivelli L, Pecchioni N, De Falcis D, Maggiore T, Stanca A. 1998.  
295 Uptake and agronomic efficiency of nitrogen in winter barley and winter wheat.  
296 *European Journal of Agronomy* 9:11-20.
- 297 43. Berg G, Rybakova D, Fischer D, Cernava T, Verges MC, Charles T, Chen X,  
298 Cocolin L, Eversole K, Corral GH, Kazou M, Kinkel L, Lange L, Lima N, Loy A,  
299 Macklin JA, Maguin E, Mauchline T, McClure R, Mitter B, Ryan M, Sarand I, Smidt  
300 H, Schelkle B, Roume H, Kiran GS, Selvin J, Souza RSC, van Overbeek L, Singh  
301 BK, Wagner M, Walsh A, Sessitsch A, Schloter M. 2020. Microbiome definition re-  
302 visited: old concepts and new challenges. *Microbiome* 8:103.
- 303 44. Zancarini A, Mougél C, Voisin A-S, Prudent M, Salon C, Munier-Jolain N. 2012. Soil  
304 nitrogen availability and plant genotype modify the nutrition strategies of *M.*  
305 *truncatula* and the associated rhizosphere microbial communities. *PLoS One*  
306 7:e47096.
- 307 45. Zgadzaj R, Garrido-Oter R, Jensen DB, Koprivova A, Schulze-Lefert P, Radutoiu S.  
308 2016. Root nodule symbiosis in *Lotus japonicus* drives the establishment of  
309 distinctive rhizosphere, root, and nodule bacterial communities. *Proceedings of the*  
310 *National Academy of Sciences* 113:E7996-E8005.
- 311 46. Thiergart T, Zgadzaj R, Bozsóki Z, Garrido-Oter R, Radutoiu S, Schulze-Lefert P.  
312 2019. *Lotus japonicus* symbiosis genes impact microbial interactions between  
313 symbionts and multikingdom commensal communities. *MBio* 10:e01833-19.
- 314 47. Zhang J, Liu Y-X, Zhang N, Hu B, Jin T, Xu H, Qin Y, Yan P, Zhang X, Guo X.  
315 2019. NRT1. 1B is associated with root microbiota composition and nitrogen use in  
316 field-grown rice. *Nature biotechnology* 37:676-684.
- 317 48. Yu P, He X, Baer M, Beirinckx S, Tian T, Moya YA, Zhang X, Deichmann M, Frey  
318 FP, Bresgen V. 2021. Plant flavones enrich rhizosphere Oxalobacteraceae to  
319 improve maize performance under nitrogen deprivation. *Nature Plants* 7:481-499.
- 320 49. Darwent MJ, Paterson E, McDonald AJS, Tomos AD. 2003. Biosensor reporting of  
321 root exudation from *Hordeum vulgare* in relation to shoot nitrate concentration.  
322 *Journal of Experimental Botany* 54:325-334.
- 323 50. Zahn S, Koblenz B, Christen O, Pillen K, Maurer A. 2020. Evaluation of wild barley  
324 introgression lines for agronomic traits related to nitrogen fertilization. *Euphytica*  
325 216:1-14.
- 326 51. Mwafurirwa L, Baggs EM, Russell J, George T, Morley N, Sim A, de la Fuente  
327 Cantó C, Paterson E. 2016. Barley genotype influences stabilization of  
328 rhizodeposition-derived C and soil organic matter mineralization. *Soil Biology and*  
329 *Biochemistry* 95:60-69.
- 330 52. Fierer N, Lauber CL, Ramirez KS, Zaneveld J, Bradford MA, Knight R. 2012.  
331 Comparative metagenomic, phylogenetic and physiological analyses of soil  
332 microbial communities across nitrogen gradients. *The ISME journal* 6:1007-1017.

- 333 53. Thomas T, Gilbert J, Meyer F. 2012. Metagenomics-a guide from sampling to data  
334 analysis. *Microbial informatics and experimentation* 2:3.
- 335 54. Feinstein LM, Sul WJ, Blackwood CB. 2009. Assessment of bias associated with  
336 incomplete extraction of microbial DNA from soil. *Applied and environmental*  
337 *microbiology* 75:5428-5433.
- 338 55. Zhou Y, Coventry DR, Gupta VV, Fuentes D, Merchant A, Kaiser BN, Li J, Wei Y,  
339 Liu H, Wang Y. 2020. The preceding root system drives the composition and  
340 function of the rhizosphere microbiome. *Genome biology* 21:1-19.
- 341 56. Roper M, Ellison C, Taylor JW, Glass NL. 2011. Nuclear and genome dynamics in  
342 multinucleate ascomycete fungi. *Current biology* 21:R786-R793.
- 343 57. Hawkins H-J, Johansen A, George E. 2000. Uptake and transport of organic and  
344 inorganic nitrogen by arbuscular mycorrhizal fungi. *Plant and Soil* 226:275-285.
- 345 58. Thirkell T, Cameron D, Hodge A. 2019. Contrasting nitrogen fertilisation rates alter  
346 mycorrhizal contribution to barley nutrition in a field trial. *Frontiers in plant science*  
347 10:1312.
- 348 59. Abbott L, Robson A, DE BOER G. 1984. The effect of phosphorus on the formation  
349 of hyphae in soil by the vesicular-arbuscular mycorrhizal fungus, *Glomus*  
350 *fasciculatum*. *New Phytologist* 97:437-446.
- 351 60. Svenningsen NB, Watts-Williams SJ, Joner EJ, Battini F, Efthymiou A, Cruz-  
352 Paredes C, Nybroe O, Jakobsen I. 2018. Suppression of the activity of arbuscular  
353 mycorrhizal fungi by the soil microbiota. *The ISME Journal* 12:1296-1307.
- 354 61. Maver M, Escudero-Martinez C, Abbott J, Morris J, Hedley PE, Mimmo T, Bulgarelli  
355 D. 2021. Applications of the indole-alkaloid gramine shape the prokaryotic  
356 microbiota thriving at the barley root-soil interface. *bioRxiv:2020.12.07.414870*.
- 357 62. Kudjordjie EN, Sapkota R, Steffensen SK, Fomsgaard IS, Nicolaisen M. 2019.  
358 Maize synthesized benzoxazinoids affect the host associated microbiome.  
359 *Microbiome* 7:1-17.
- 360 63. Cadot S, Guan H, Bigalke M, Walser J-C, Jander G, Erb M, van der Heijden MG,  
361 Schlaeppli K. 2021. Specific and conserved patterns of microbiota-structuring by  
362 maize benzoxazinoids in the field. *Microbiome* 9:1-19.
- 363 64. Lebeis SL, Paredes SH, Lundberg DS, Breakfield N, Gehring J, McDonald M,  
364 Malfatti S, Del Rio TG, Jones CD, Tringe SG. 2015. Salicylic acid modulates  
365 colonization of the root microbiome by specific bacterial taxa. *Science* 349:860-864.
- 366 65. Zipfel C, Robatzek S, Navarro L, Oakeley EJ, Jones JD, Felix G, Boller T. 2004.  
367 Bacterial disease resistance in *Arabidopsis* through flagellin perception. *Nature*  
368 428:764-767.
- 369 66. Colaianni NR, Parys K, Lee H-S, Conway JM, Kim NH, Edelbacher N, Mucyn TS,  
370 Madalinski M, Law TF, Jones CD. 2021. A complex immune response to flagellin  
371 epitope variation in commensal communities. *Cell Host & Microbe* 29:635-649. e9.
- 372 67. Pfeilmeier S, Petti GC, Bortfeld-Miller M, Daniel B, Field CM, Sunagawa S, Vorholt  
373 JA. 2021. The plant NADPH oxidase RBOHD is required for microbiota  
374 homeostasis in leaves. *Nature Microbiology* 6:852-864.
- 375 68. Lynn TM, Ge T, Yuan H, Wei X, Wu X, Xiao K, Kumaresan D, Yu SS, Wu J,  
376 Whiteley AS. 2017. Soil carbon-fixation rates and associated bacterial diversity and  
377 abundance in three natural ecosystems. *Microbial ecology* 73:645-657.
- 378 69. Fierer N, Leff JW, Adams BJ, Nielsen UN, Bates ST, Lauber CL, Owens S, Gilbert  
379 JA, Wall DH, Caporaso JG. 2012. Cross-biome metagenomic analyses of soil  
380 microbial communities and their functional attributes. *Proceedings of the National*  
381 *Academy of Sciences* 109:21390-21395.
- 382 70. Isobe K, Bouskill NJ, Brodie EL, Sudderth EA, Martiny JB. 2020. Phylogenetic  
383 conservation of soil bacterial responses to simulated global changes. *Philosophical*  
384 *Transactions of the Royal Society B* 375:20190242.

- 385 71. Griffiths BS, Spilles A, Bonkowski M. 2012. C: N: P stoichiometry and nutrient  
386 limitation of the soil microbial biomass in a grazed grassland site under  
387 experimental P limitation or excess. *Ecological Processes* 1:1-11.
- 388 72. Van Goethem MW, Osborn AR, Bowen B, Andeer PF, Swenson TL, Clum A, Riley  
389 R, He G, Koriabine M, Sandor LC. 2021. Long-read metagenomics of soil  
390 communities reveals phylum-specific secondary metabolite dynamics. *bioRxiv*.
- 391 73. Xu L, Dong Z, Chiniquy D, Pierroz G, Deng S, Gao C, Diamond S, Simmons T, Wipf  
392 HM-L, Caddell D. 2021. Genome-resolved metagenomics reveals role of iron  
393 metabolism in drought-induced rhizosphere microbiome dynamics. *Nature*  
394 *communications* 12:1-17.
- 395 74. Wong HL, MacLeod FI, White RA, Visscher PT, Burns BP. 2020. Microbial dark  
396 matter filling the niche in hypersaline microbial mats. *Microbiome* 8:1-14.
- 397 75. Castelle CJ, Banfield JF. 2018. Major new microbial groups expand diversity and  
398 alter our understanding of the tree of life. *Cell* 172:1181-1197.
- 399 76. Castelle CJ, Hug LA, Wrighton KC, Thomas BC, Williams KH, Wu D, Tringe SG,  
400 Singer SW, Eisen JA, Banfield JF. 2013. Extraordinary phylogenetic diversity and  
401 metabolic versatility in aquifer sediment. *Nature communications* 4:1-10.
- 402 77. Bulgarelli D, Rott M, Schlaeppli K, van Themaat EVL, Ahmadinejad N, Assenza F,  
403 Rauf P, Huettel B, Reinhardt R, Schmelzer E. 2012. Revealing structure and  
404 assembly cues for *Arabidopsis* root-inhabiting bacterial microbiota. *Nature* 488:91-  
405 95.
- 406 78. Grondin JM, Tamura K, Déjean G, Abbott DW, Brumer H. 2017. Polysaccharide  
407 utilization loci: fueling microbial communities. *Journal of bacteriology* 199:e00860-  
408 16.
- 409 79. Larsbrink J, Rogers TE, Hemsworth GR, McKee LS, Tauzin AS, Spadiut O, Klintner  
410 S, Pudlo NA, Urs K, Koropatkin NM. 2014. A discrete genetic locus confers  
411 xyloglucan metabolism in select human gut Bacteroidetes. *Nature* 506:498-502.
- 412 80. Aditya J, Lewis J, Shirley NJ, Tan HT, Henderson M, Fincher GB, Burton RA,  
413 Mather DE, Tucker MR. 2015. The dynamics of cereal cyst nematode infection  
414 differ between susceptible and resistant barley cultivars and lead to changes in (1,  
415 3; 1, 4)- $\beta$ -glucan levels and HvCslF gene transcript abundance. *New Phytologist*  
416 207:135-147.
- 417 81. Schreiber M, Wright F, MacKenzie K, Hedley PE, Schwerdt JG, Little A, Burton RA,  
418 Fincher GB, Marshall D, Waugh R. 2014. The barley genome sequence assembly  
419 reveals three additional members of the CslF (1, 3; 1, 4)- $\beta$ -glucan synthase gene  
420 family. *PloS one* 9:e90888.
- 421 82. Fitzpatrick CR, Gehant L, Kotanen PM, Johnson MT. 2017. Phylogenetic  
422 relatedness, phenotypic similarity and plant–soil feedbacks. *Journal of Ecology*  
423 105:786-800.
- 424 83. Kaplan I, Bokulich NA, Caporaso JG, Enders LS, Ghanem W, Ingerslew KS. 2020.  
425 Phylogenetic farming: Can evolutionary history predict crop rotation via the soil  
426 microbiome? *Evolutionary Applications* 13:1984-1999.
- 427 84. Fitzpatrick CR, Copeland J, Wang PW, Guttman DS, Kotanen PM, Johnson MT.  
428 2018. Assembly and ecological function of the root microbiome across angiosperm  
429 plant species. *Proceedings of the National Academy of Sciences* 115:E1157-  
430 E1165.
- 431 85. Maver M, Miras-Moreno B, Lucini L, Trevisan M, Pii Y, Cesco S, Mimmo T. 2020.  
432 New insights in the allelopathic traits of different barley genotypes: Middle Eastern  
433 and Tibetan wild-relative accessions vs. cultivated modern barley. *Plos one*  
434 15:e0231976.
- 435 86. Maver M, Escudero-Martinez C, Abbott J, Morris J, Hedley PE, Mimmo T, Bulgarelli  
436 D. 2021. Applications of the indole-alkaloid gramine modulate the assembly of

- 437 individual members of the barley rhizosphere microbiota. bioRxiv:2020.12.  
438 07.414870.
- 439 87. Edwards J, Santos-Medellín C, Nguyen B, Kilmer J, Liechty Z, Veliz E, Ni J, Phillips  
440 G, Sundaresan V. 2019. Soil domestication by rice cultivation results in plant-soil  
441 feedback through shifts in soil microbiota. *Genome biology* 20:1-14.
- 442 88. Robertson-Albertyn S, Concas F, Brown LH, Orr JN, Abbott JC, George TS,  
443 Bulgarelli D. 2021. A genome-annotated bacterial collection of the barley  
444 rhizosphere microbiota. bioRxiv.
- 445 89. Mahdi LK, Miyauchi S, Uhlmann C, Garrido-Oter R, Langen G, Wawra S, Niu Y,  
446 Guan R, Robertson-Albertyn S, Bulgarelli D. 2021. The fungal root endophyte  
447 *Serendipita vermifera* displays inter-kingdom synergistic beneficial effects with the  
448 microbiota in *Arabidopsis thaliana* and barley. *The ISME journal*:1-14.
- 449 90. Bulgarelli D, Biselli C, Collins NC, Consonni G, Stanca AM, Schulze-Lefert P, Vale  
450 G. 2010. The CC-NB-LRR-Type Rdg2a Resistance Gene Confers Immunity to the  
451 Seed-Borne Barley Leaf Stripe Pathogen in the Absence of Hypersensitive Cell  
452 Death. *Plos One* 5.
- 453 91. Caporaso JG, Lauber CL, Walters WA, Berg-Lyons D, Huntley J, Fierer N, Owens  
454 SM, Betley J, Fraser L, Bauer M, Gormley N, Gilbert JA, Smith G, Knight R. 2012.  
455 Ultra-high-throughput microbial community analysis on the Illumina HiSeq and  
456 MiSeq platforms. *ISME J* 6:1621-4.
- 457 92. Andrews SF, Krueger F, Seconds-Pichon A, Biggins F, Wingett SF. 2014. A quality  
458 control tool for high throughput sequence data. *Babraham Bioinformatics*.
- 459 93. Callahan BJ, McMurdie PJ, Rosen MJ, Han AW, Johnson AJA, Holmes SP. 2016.  
460 DADA2: High-resolution sample inference from Illumina amplicon data. *Nature*  
461 *methods* 13:581-583.
- 462 94. R Core Team. 2020. R: A language and environment for statistical computing., R  
463 Foundation for Statistical Computing, Vienna, Austria. <https://www.R-project.org/>.
- 464 95. Callahan BJ. 2020. DADA2 Pipeline Tutorial.  
465 <https://benjjneb.github.io/dada2/tutorial.html>. Accessed June 2020.
- 466 96. Quast C, Pruesse E, Yilmaz P, Gerken J, Schweer T, Yarza P, Peplies J, Glöckner  
467 FO. 2012. The SILVA ribosomal RNA gene database project: improved data  
468 processing and web-based tools. *Nucleic acids research* 41:D590-D596.
- 469 97. McMurdie PJ, Holmes S. 2013. phyloseq: An R Package for Reproducible  
470 Interactive Analysis and Graphics of Microbiome Census Data. *PLOS ONE*  
471 8:e61217.
- 472 98. Pietrangelo L, Bucci A, Maiuro L, Bulgarelli D, Naclerio G. 2018. Unraveling the  
473 composition of the root-associated bacterial microbiota of *Phragmites australis* and  
474 *Typha latifolia*. *Frontiers in microbiology* 9:1650.
- 475 99. Weiss S, Xu ZZ, Peddada S, Amir A, Bittinger K, Gonzalez A, Lozupone C,  
476 Zaneveld JR, Vázquez-Baeza Y, Birmingham A. 2017. Normalization and microbial  
477 differential abundance strategies depend upon data characteristics. *Microbiome*  
478 5:27.
- 479 100. Hoyles L, Fernández-Real J-M, Federici M, Serino M, Abbott J, Charpentier J,  
480 Heymes C, Luque JL, Anthony E, Barton RH, Chilloux J, Myridakis A, Martinez-Gili  
481 L, Moreno-Navarrete JM, Benhamed F, Azalbert V, Blasco-Baque V, Puig J, Xifra  
482 G, Ricart W, Tomlinson C, Woodbridge M, Cardellini M, Davato F, Cardolini I,  
483 Porzio O, Gentileschi P, Lopez F, Fougelle F, Butcher SA, Holmes E, Nicholson JK,  
484 Postic C, Burcelin R, Dumas M-E. 2018. Molecular phenomics and metagenomics  
485 of hepatic steatosis in non-diabetic obese women. *Nature medicine* 24:1070-1080.
- 486 101. Andrews S. 2010. FastQC: A quality control tool for high throughput sequence  
487 data., <http://www.bioinformatics.babraham.ac.uk/projects/fastqc/>.



- 488 102. Kreuger F. 2015. TrimGalore: A wrapper tool around Cutadapt and FastQC to  
489 consistently apply quality and adapter trimming to FastQ files,  
490 [https://www.bioinformatics.babraham.ac.uk/projects/trim\\_galore/](https://www.bioinformatics.babraham.ac.uk/projects/trim_galore/).
- 491 103. Wood DE, Lu J, Langmead B. 2019. Improved metagenomic analysis with Kraken  
492 2. *Genome Biology* 20:257.
- 493 104. Langmead B. 2021. Kraken PlusPFP database, 20210127 ed, [https://genome-  
494 idx.s3.amazonaws.com/kraken/k2\\_pluspfp\\_20210127.tar.gz](https://genome-idx.s3.amazonaws.com/kraken/k2_pluspfp_20210127.tar.gz).
- 495 105. Monat C, Padmarasu S, Lux T, Wicker T, Gundlach H, Himmelbach A, Ens J, Li C,  
496 Muehlbauer GJ, Schulman AH. 2019. TRITEX: chromosome-scale sequence  
497 assembly of Triticeae genomes with open-source tools. *Genome biology* 20:284.
- 498 106. Li H. 2013. Aligning sequence reads, clone sequences and assembly contigs with  
499 BWA-MEM. arXiv e-prints:arXiv:1303.3997.
- 500 107. Li H, Handsaker B, Wysoker A, Fennell T, Ruan J, Homer N, Marth G, Abecasis G,  
501 Durbin R, Genome Project Data Processing S. 2009. The Sequence Alignment/Map  
502 format and SAMtools. *Bioinformatics* 25:2078-2079.
- 503 108. Li D, Liu C-M, Luo R, Sadakane K, Lam T-W. 2015. MEGAHIT: an ultra-fast single-  
504 node solution for large and complex metagenomics assembly via succinct de Bruijn  
505 graph. *Bioinformatics* 31:1674-1676.
- 506 109. Hyatt D, Chen G-L, Locascio PF, Land ML, Larimer FW, Hauser LJ. 2010. Prodigal:  
507 prokaryotic gene recognition and translation initiation site identification. *BMC  
508 bioinformatics* 11:119-119.
- 509 110. Steinegger M, Söding J. 2017. MMseqs2 enables sensitive protein sequence  
510 searching for the analysis of massive data sets. *Nature Biotechnology* 35:1026-  
511 1028.
- 512 111. Heger A, Jacobs K. 2018. pysam - An interface for reading and writing SAM files.
- 513 112. Jones P, Binns D, Chang H-Y, Fraser M, Li W, McAnulla C, McWilliam H, Maslen J,  
514 Mitchell A, Nuka G, Pesseat S, Quinn AF, Sangrador-Vegas A, Scheremetjew M,  
515 Yong S-Y, Lopez R, Hunter S. 2014. InterProScan 5: genome-scale protein function  
516 classification. *Bioinformatics (Oxford, England)* 30:1236-1240.
- 517 113. Harris MA, Clark J, Ireland A, Lomax J, Ashburner M, Foulger R, Eilbeck K, Lewis  
518 S, Marshall B, Mungall C, Richter J, Rubin GM, Blake JA, Bult C, Dolan M, Drabkin  
519 H, Eppig JT, Hill DP, Ni L, Ringwald M, Balakrishnan R, Cherry JM, Christie KR,  
520 Costanzo MC, Dwight SS, Engel S, Fisk DG, Hirschman JE, Hong EL, Nash RS,  
521 Sethuraman A, Theesfeld CL, Botstein D, Dolinski K, Feierbach B, Berardini T,  
522 Mundodi S, Rhee SY, Apweiler R, Barrell D, Camon E, Dimmer E, Lee V, Chisholm  
523 R, Gaudet P, Kibbe W, Kishore R, Schwarz EM, Sternberg P, Gwinn M, et al. 2004.  
524 The Gene Ontology (GO) database and informatics resource. *Nucleic acids  
525 research* 32:D258-61.
- 526 114. Mungall C, Douglass E, Balhoff J, Lewis S, Kim H, Overton J, Keith Dan, Daniel H.  
527 2020. OWLTools is a convenience java API on top of the OWL API.,  
528 <http://doi.org/10.5281/zenodo.3742260>.
- 529 115. Love MI, Huber W, Anders S. 2014. Moderated estimation of fold change and  
530 dispersion for RNA-seq data with DESeq2. *Genome Biol* 15:550.
- 531 116. Nayfach S, Shi ZJ, Seshadri R, Pollard KS, Kyrpides NC. 2019. New insights from  
532 uncultivated genomes of the global human gut microbiome. *Nature* 568:505-510.
- 533 117. Parks DH, Imelfort M, Skennerton CT, Hugenholtz P, Tyson GW. 2015. CheckM:  
534 assessing the quality of microbial genomes recovered from isolates, single cells,  
535 and metagenomes. *Genome research* 25:1043-1055.
- 536 118. Seemann T. 2014. Prokka: rapid prokaryotic genome annotation. *Bioinformatics*  
537 30:2068-2069.

- 538 119. Chaumeil P-A, Mussig AJ, Hugenholtz P, Parks DH. 2020. GTDB-Tk: a toolkit to  
539 classify genomes with the Genome Taxonomy Database. *Bioinformatics* 36:1925-  
540 1927.
- 541 120. Tu Q, Lin L, Cheng L, Deng Y, He Z. 2019. NCycDB: a curated integrative database  
542 for fast and accurate metagenomic profiling of nitrogen cycling genes.  
543 *Bioinformatics* 35:1040-1048.
- 544 121. Wickham H. 2016. *ggplot2: elegant graphics for data analysis*. Springer.
- 545 122. Oksanen J, Blanchet FG, Kindt R, Legendre P, Minchin P, O'hara R, Simpson G,  
546 Solymos P, Stevens M, Wagner H. 2016. *vegan: community ecology package*. R  
547 package version 2.0–7. 2013. URL [http://CRAN](http://CRAN.R-project.org/package=vegan) R-project org/package= vegan.
- 548 123. Pohlert T. 2014. The pairwise multiple comparison of mean ranks package  
549 (PMCMR). R package 27.
- 550 124. de Mendiburu F, de Mendiburu MF. 2017. Package 'agricolae'. R Package,  
551 Version:1.2-1.
- 552

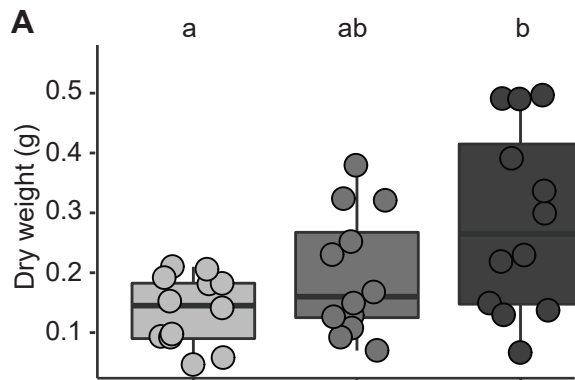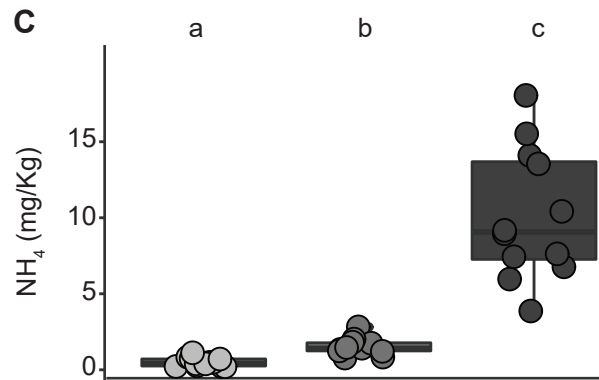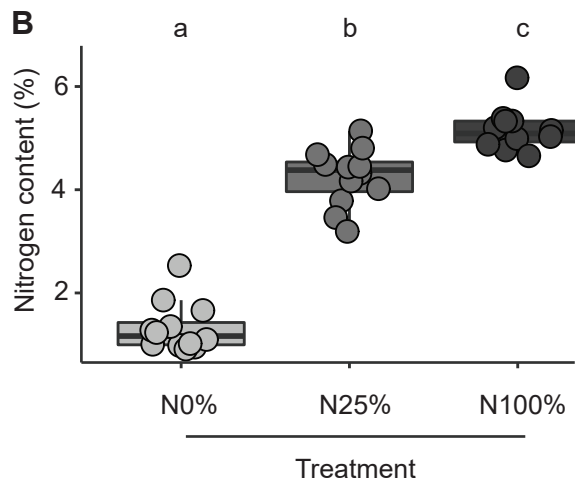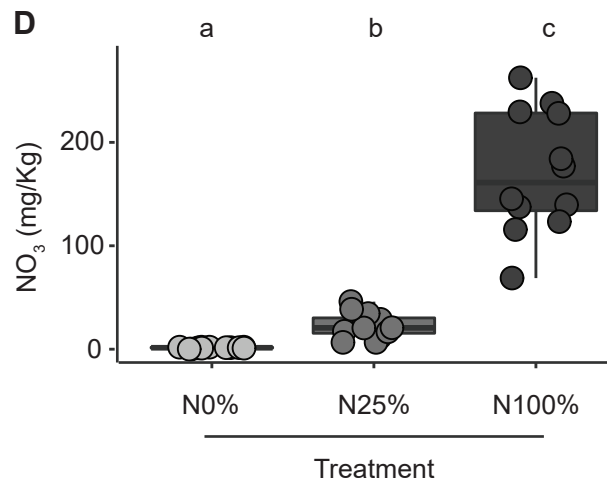

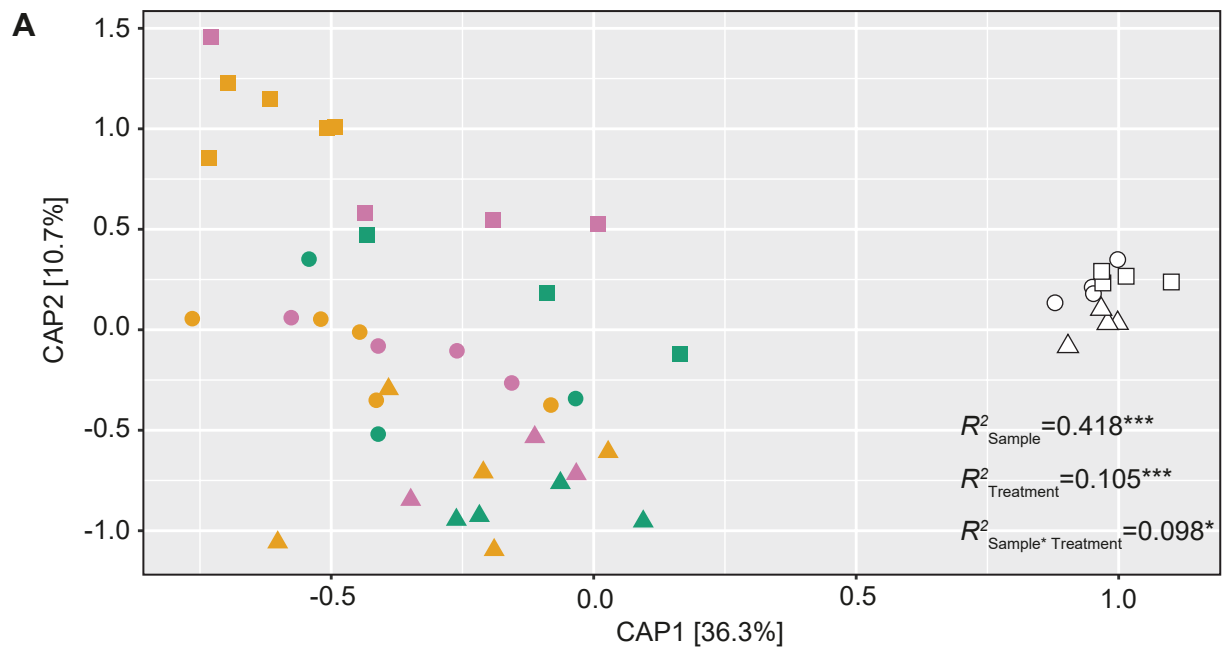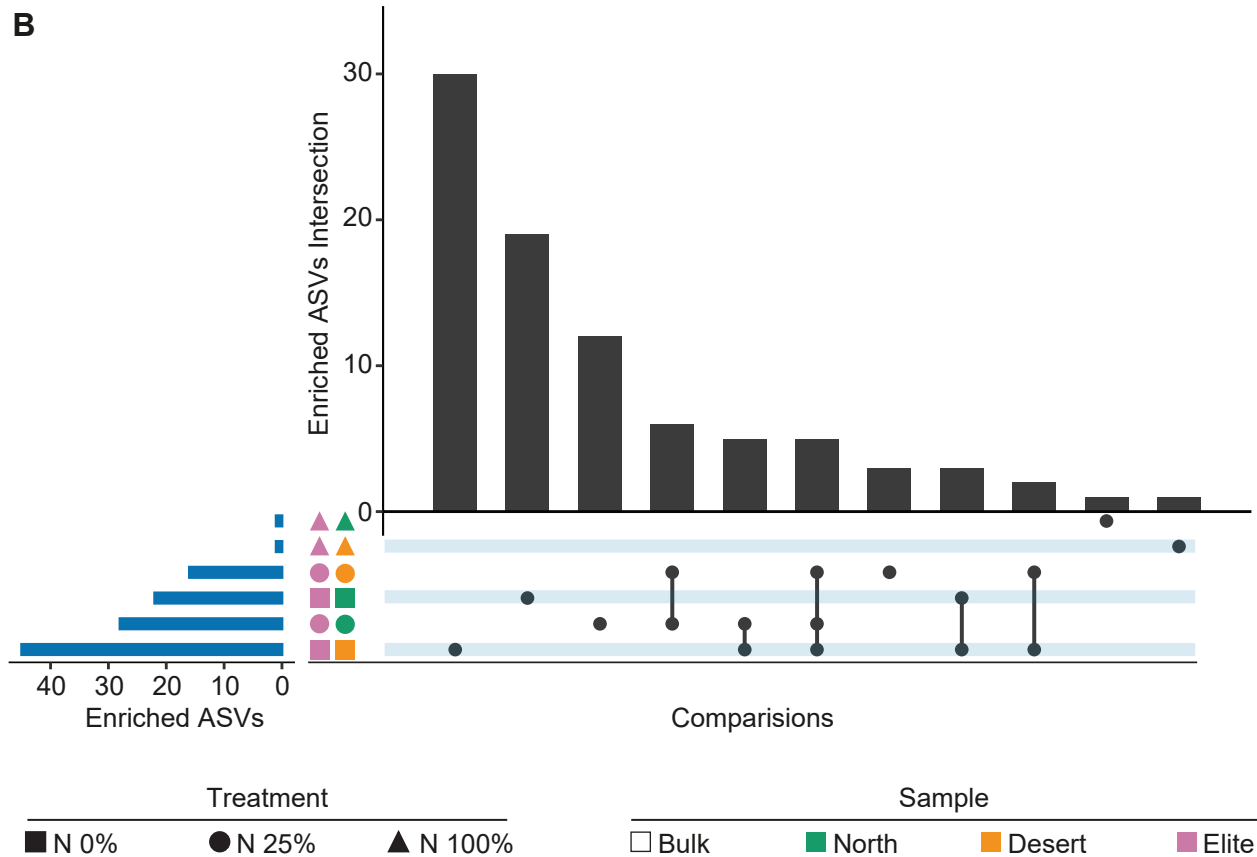

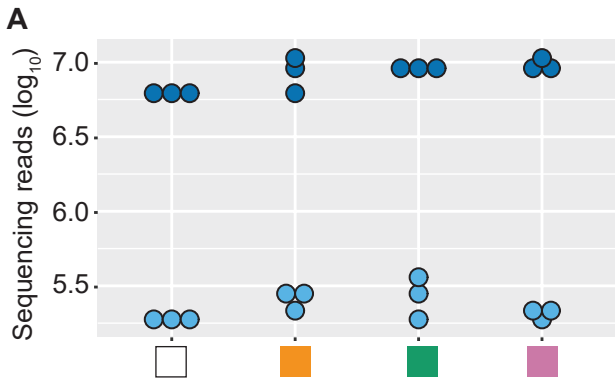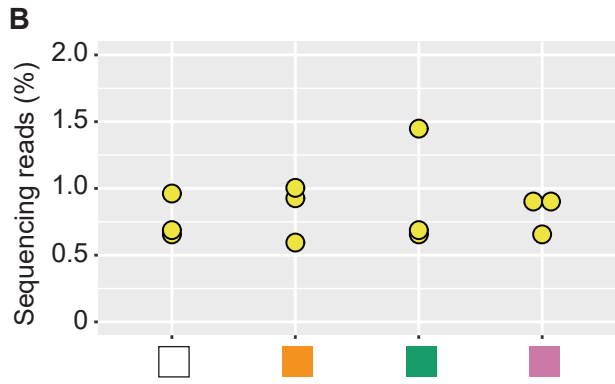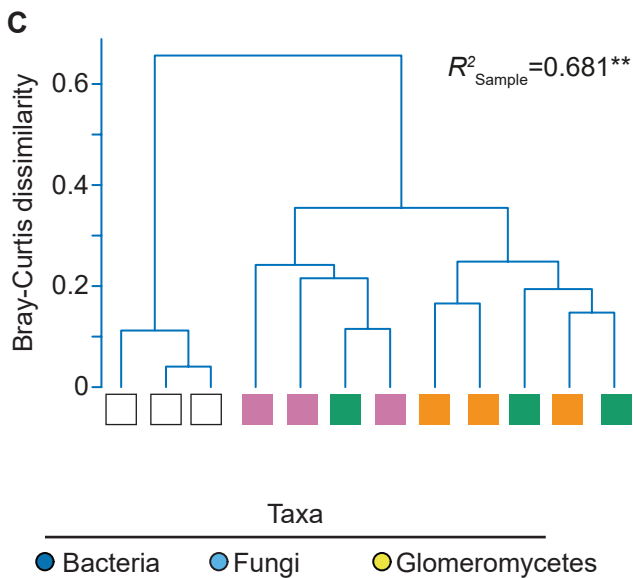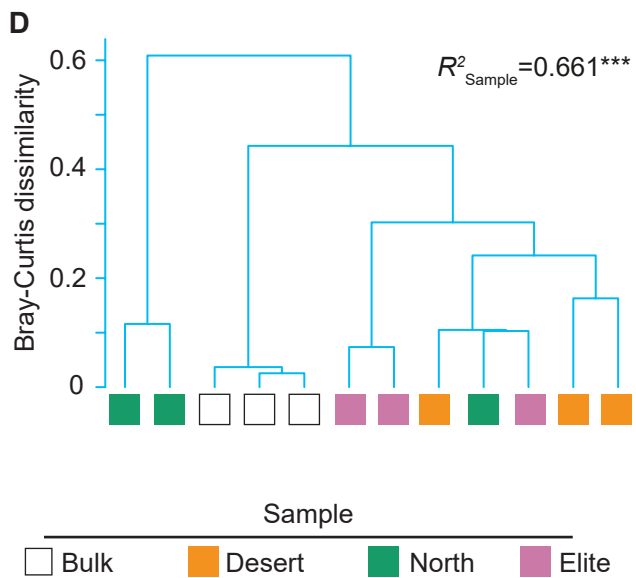

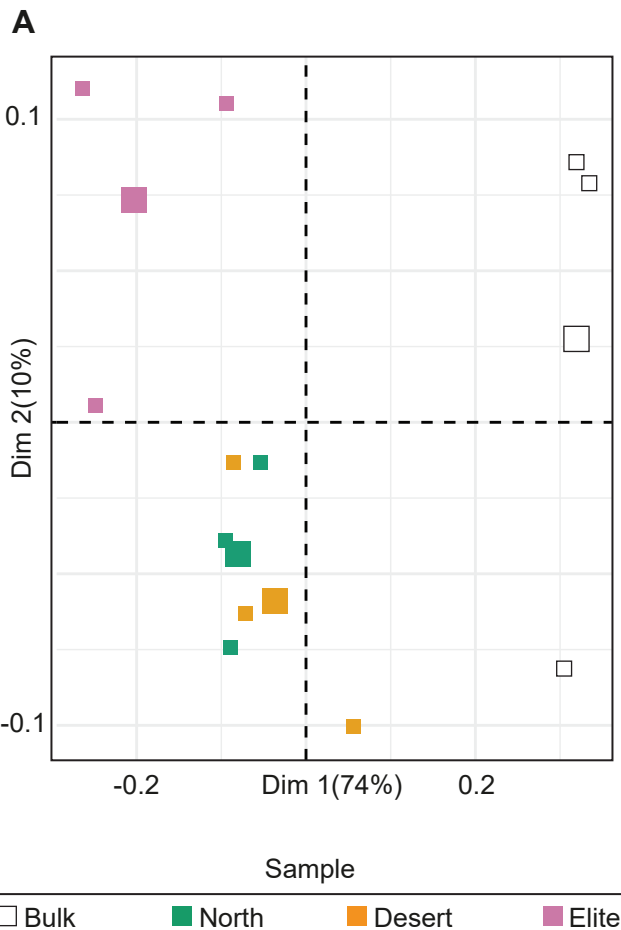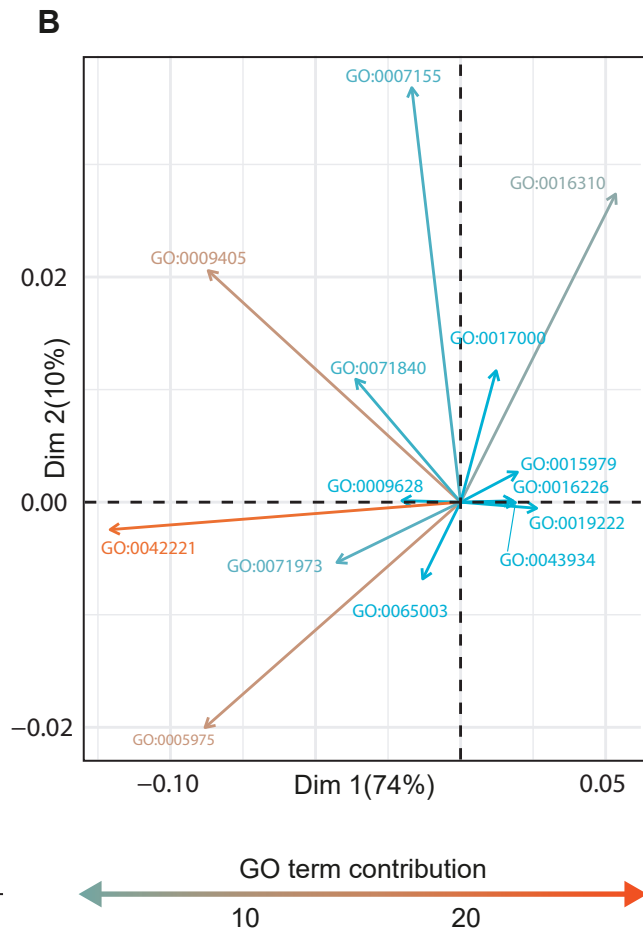

A

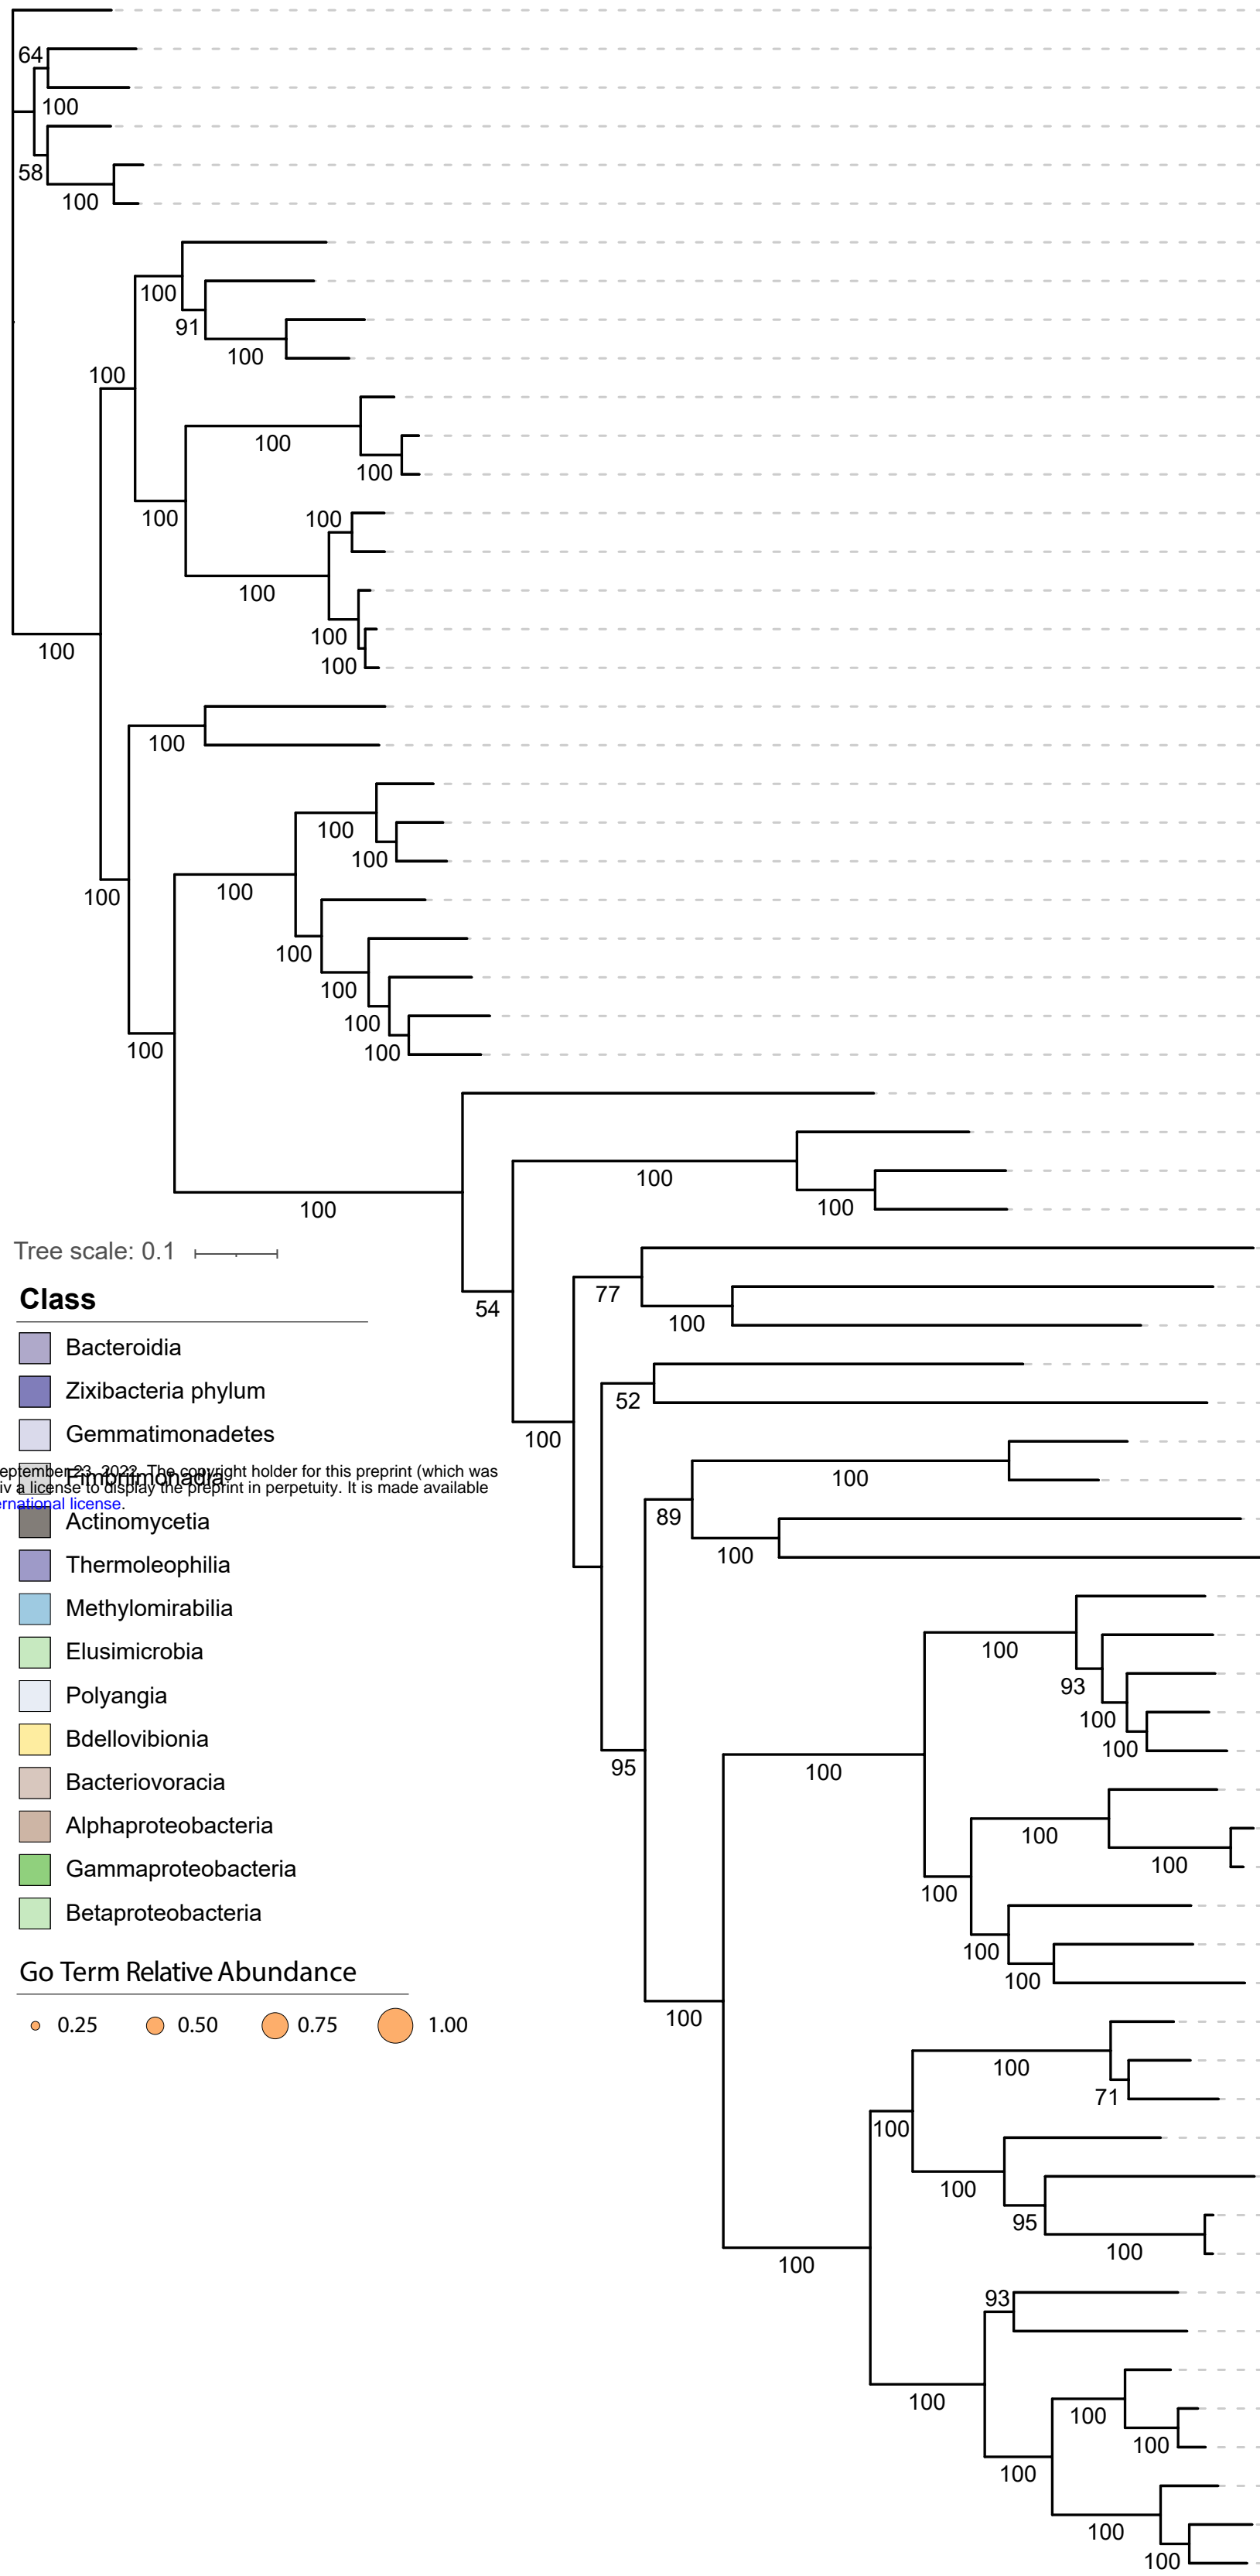

B

MAG

bin.231 *Sphingobacterium* sp002472835  
 bin.169 *Mucilagibacter* sp.  
 bin.324 *Pelobium* sp.  
 bin.21 Sphingobacteriaceae family  
 bin.238 *Pedobacter ginsengisoli*  
 bin.122 *Pedobacter* sp.  
 bin.272 Bacteroidia class  
 bin.126 Bacteroidia class  
 bin.174 Bacteroidia class  
 bin.74 Bacteroidia class  
 bin.268 *Flavobacterium endophyticum*  
 bin.52 *Flavobacterium* sp.  
 bin.335 *Flavobacterium* sp.  
 bin.22 *Fluviicola* sp.  
 bin.19 *Fluviicola* sp.  
 bin.119 *Fluviicola* sp.  
 bin.328 *Fluviicola* sp.  
 bin.319 *Fluviicola* sp.  
 bin.224 Cyclobacteriaceae family  
 bin.49 *Dyadobacter* sp.  
 bin.208 *Flavipsychrobacter* sp.  
 bin.358 *Flavipsychrobacter* sp.  
 bin.336 *Flavipsychrobacter* sp.  
 bin.152 *Chitinophaga* sp.  
 bin.158 Chitinophagaceae family  
 bin.178 Chitinophagaceae family  
 bin.24 Chitinophagaceae family  
 bin.142 Chitinophagaceae family  
 bin.109 Zixibacteria phylum  
 bin.11 Gemmatimonadales order  
 bin.97 Gemmatimonadales order  
 bin.37 Gemmatimonadales order  
 bin.242 Fimbrimonadaceae family  
 bin.99 *Pseudarthrobacter* sp.  
 bin.252 Gaiellales order  
 bin.58 Rokubacteriales order  
 bin.221 Elusimicrobia class  
 bin.128 Haliangiaceae family  
 bin.259 Haliangiaceae family  
 bin.180 *Bdellovibrionaceae* family  
 bin.227 Bacteriovoracaceae family  
 bin.312 *Altererythrobacter B* sp.  
 bin.61 *Sphingobium* sp.  
 bin.310 *Sphingomonas B* sp.  
 bin.5 *Sphingomonas* sp.  
 bin.48 *Sphingomonas* sp.  
 bin.356 Caulobacteraceae family  
 bin.297 *Asticcacaulis* sp.  
 bin.98 *Asticcacaulis taihuensis*  
 bin.111 *Methyloceanibacter* sp.  
 bin.96 *Mesorhizobium* sp001427025  
 bin.42 *Devosia* sp.  
 bin.222 *Pseudoxanthomonas A* sp.  
 bin.84 *Lysobacter* sp001428685  
 bin.329 *Thermomonas* sp.  
 bin.273 *Pseudomonas E corrugata*  
 bin.175 *Pantoea agglomerans*  
 bin.53 *Cellvibrio* sp.  
 bin.357 *Cellvibrio* sp.  
 bin.223 Burkholderiales order  
 bin.151 Burkholderiales order  
 bin.200 *Hermiimonas* sp.  
 bin.303 *Massilia* sp.  
 bin.165 *Massilia* sp.  
 bin.90 *Polaromonas* sp.  
 bin.339 *Acidovorax D* sp001411535  
 bin.63 *Variovorax* sp.

C

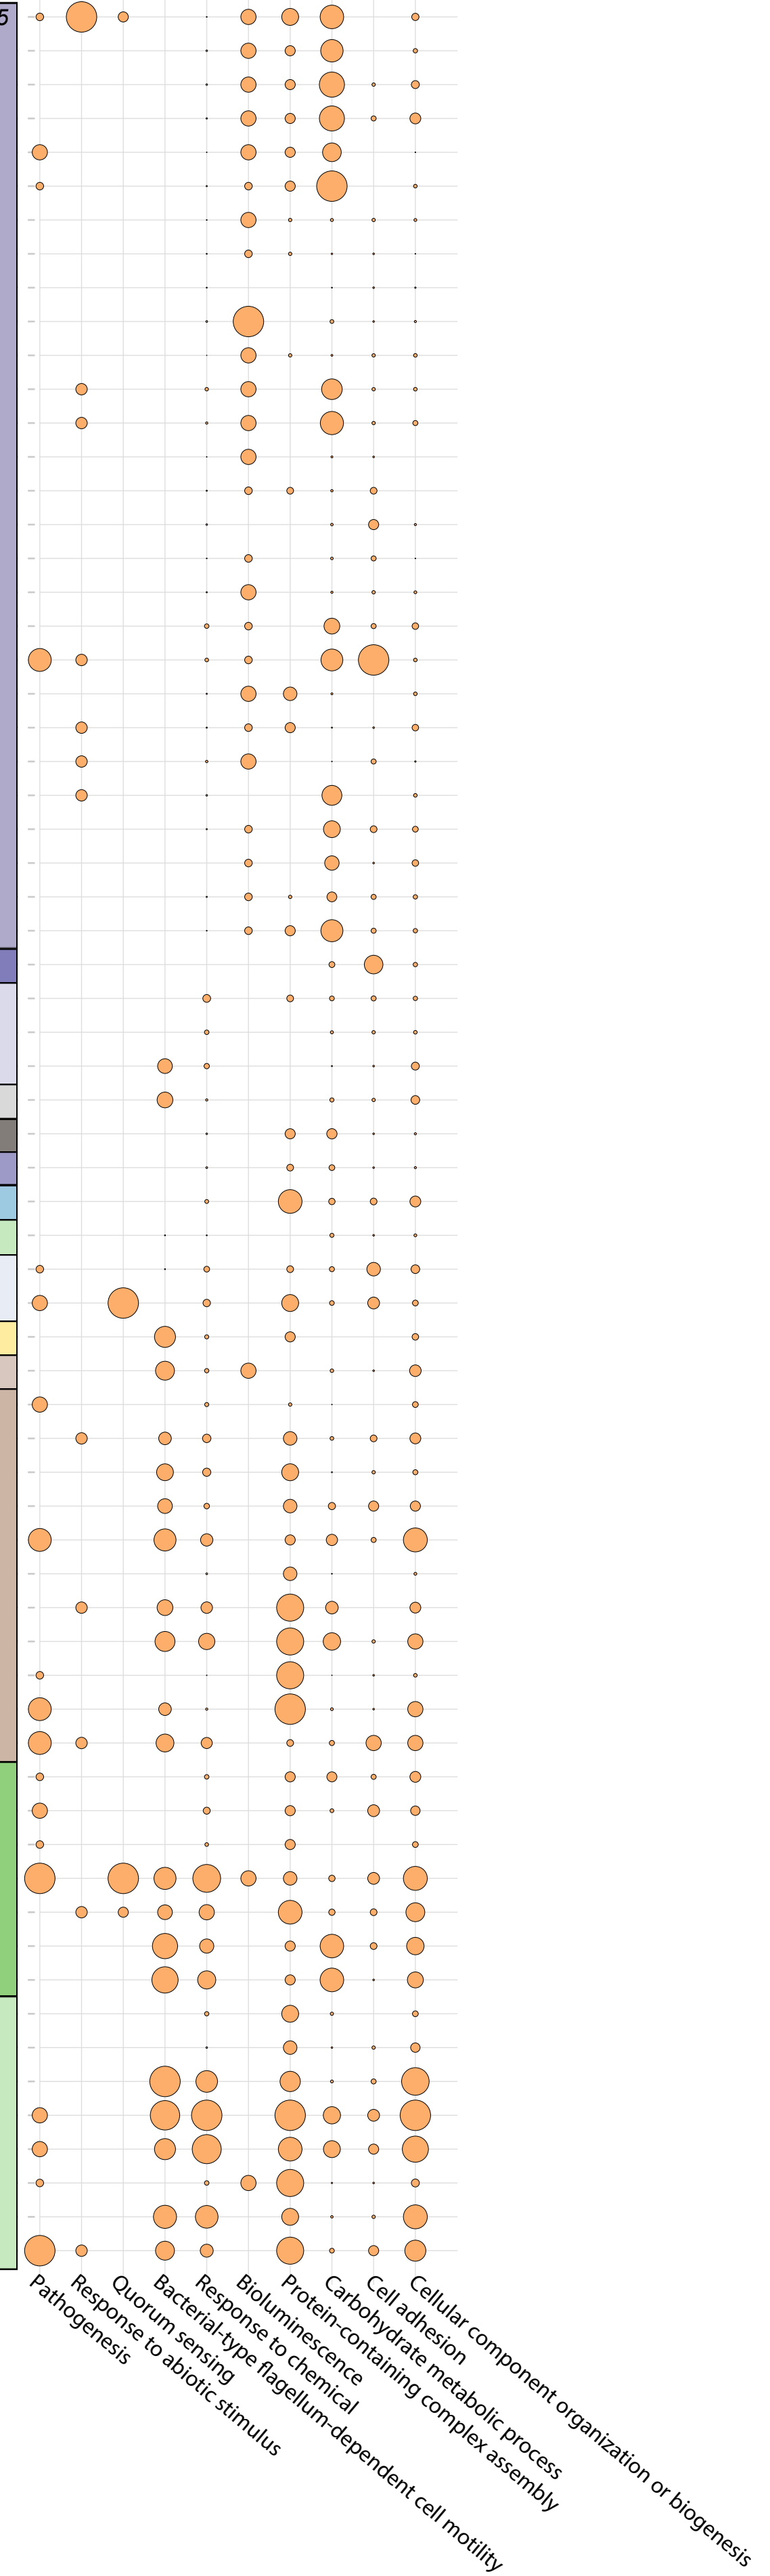

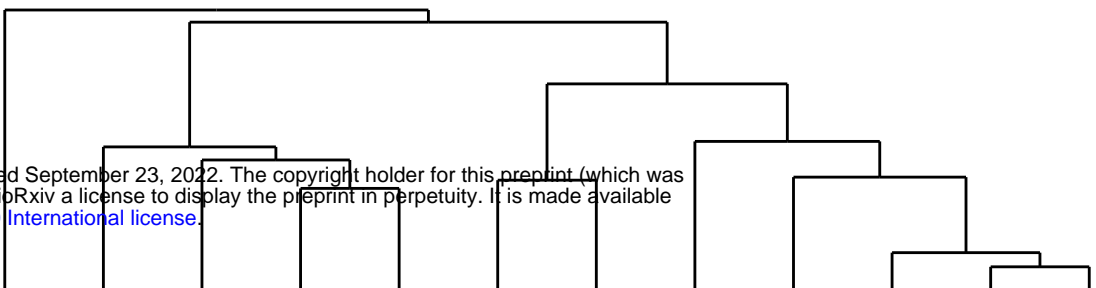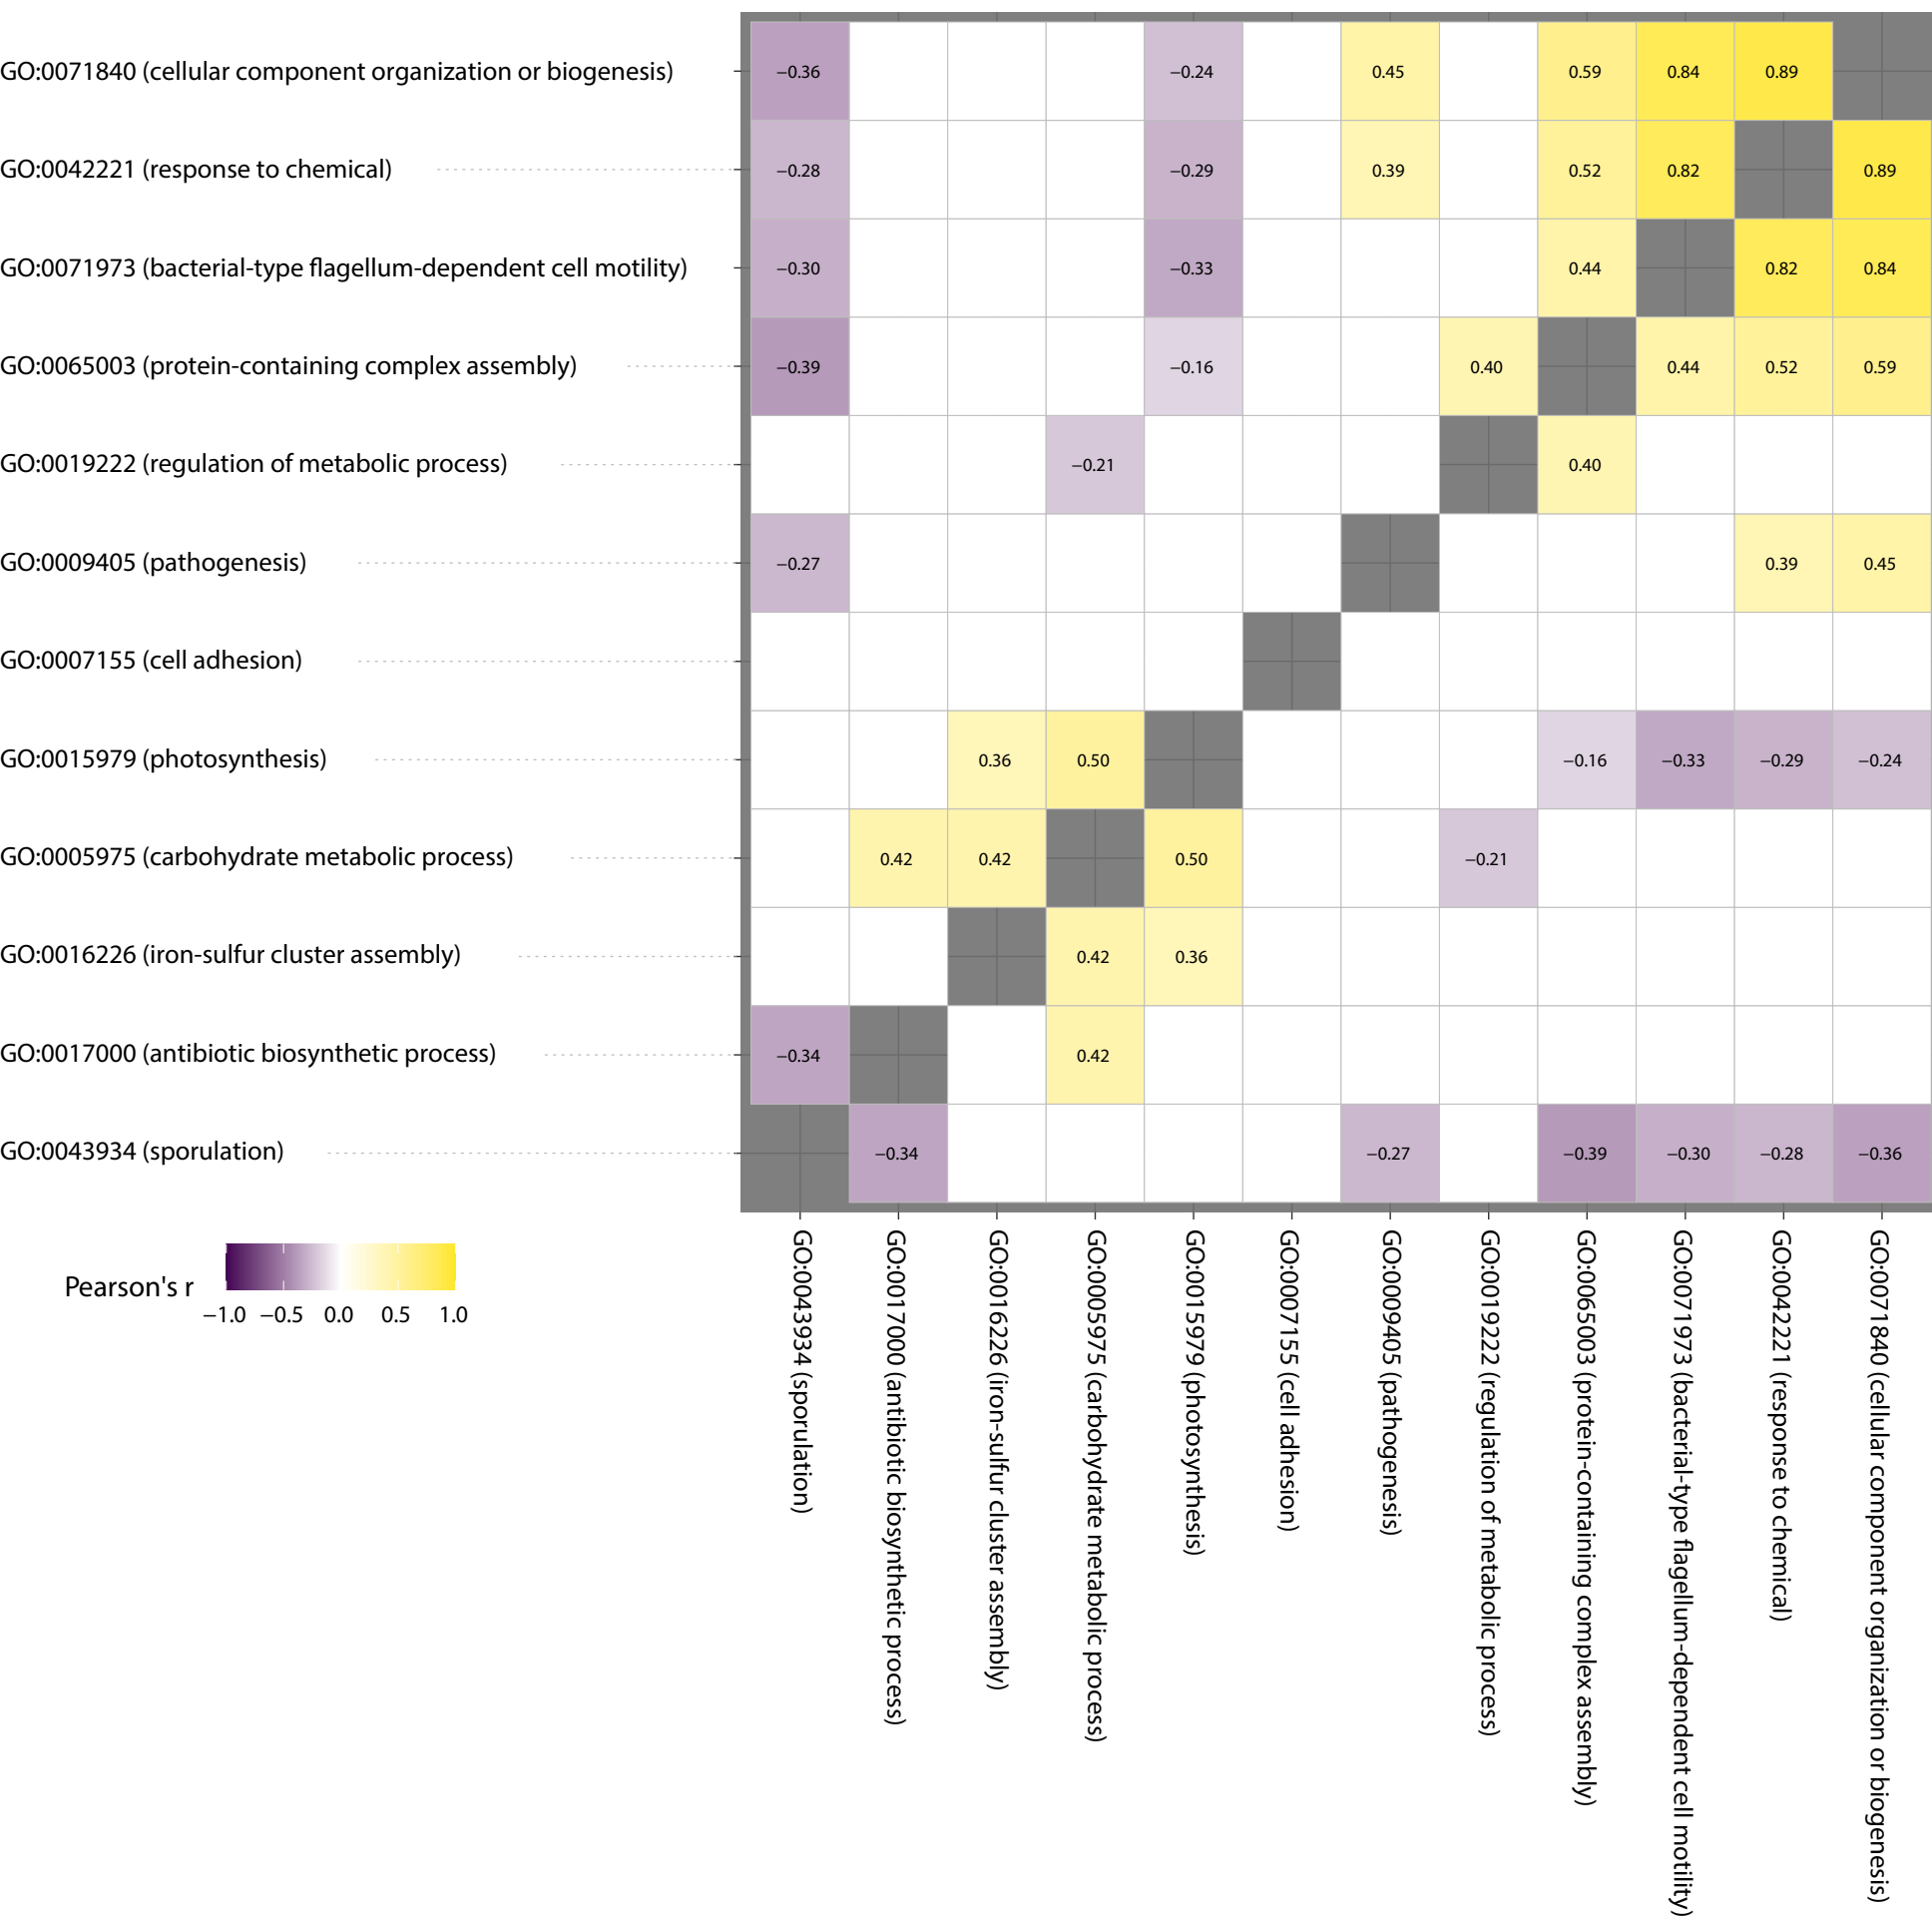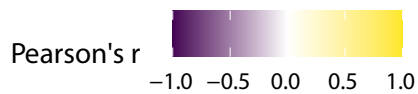



**A**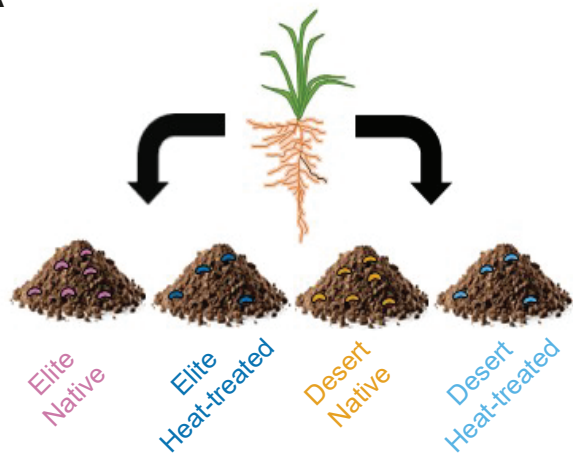**B**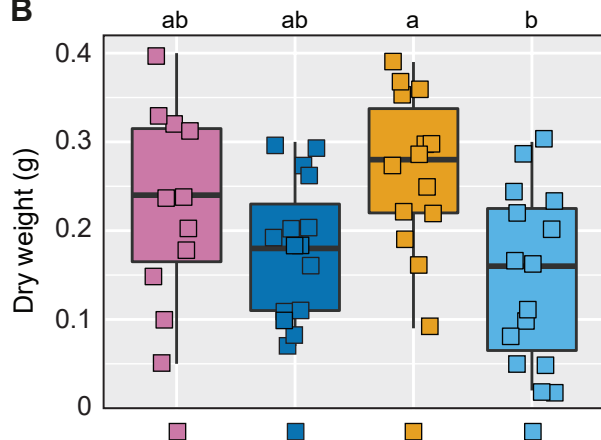**C**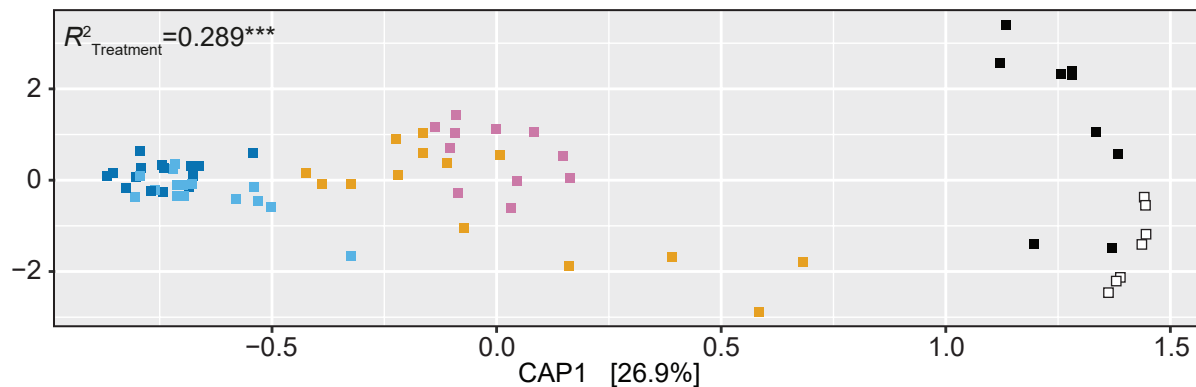**D**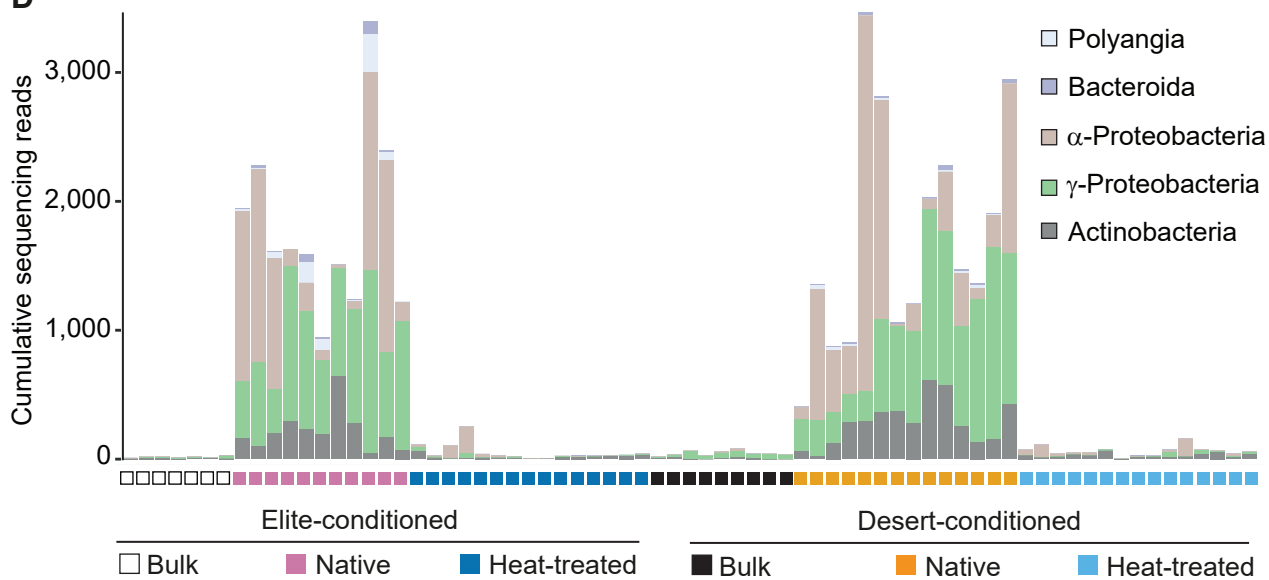

Source: https://www.biorxiv.org/content/10.1101/605204v3.full.pdf
